1 **Original Research Article**

2

3 **Genomic sequencing confirms absence of introgression despite past hybridisation in a**  
4 **critically endangered bird**

5

6 Natalie J. Forsdick<sup>1\*</sup>, Denise Martini<sup>1</sup>, Liz Brown<sup>2</sup>, Richard F. Maloney<sup>3</sup>, Tammy E.  
7 Steeves<sup>4</sup>, Michael Knapp<sup>1</sup>

8

9 <sup>1</sup>. Department of Anatomy, University of Otago, Dunedin, New Zealand.

10 <sup>2</sup>. Department of Conservation, Twizel, New Zealand.

11 <sup>3</sup>. Department of Conservation, Christchurch, New Zealand.

12 <sup>4</sup>. School of Biological Sciences, University of Canterbury, Christchurch, New Zealand.

13 \* Author for correspondence ([natalieforsdick@gmail.com](mailto:natalieforsdick@gmail.com))

14

15 **Running head:** Genomic data finds no introgression in kakī

16

17 **1 Abstract**

18

19 Genetic swamping resulting from interspecific hybridisation can increase extinction risk for  
20 threatened species. The development of high-throughput and reduced-representation genomic  
21 sequencing and analyses to generate large numbers of high resolution genomic markers has  
22 the potential to reveal introgression previously undetected using small numbers of genetic  
23 markers. However, few studies to date have implemented genomic tools to assess the impacts  
24 of interspecific hybridisation in threatened species. Here we investigate the utility of genome-  
25 wide single nucleotide polymorphisms (SNPs) to detect introgression resulting from past  
26 interspecific hybridisation in one of the world's rarest birds. Anthropogenic impacts have  
27 resulted in hybridisation and subsequent backcrossing of the critically endangered Aotearoa  
28 New Zealand endemic kakī (black stilts; *Himantopus novaezelandiae*) with the non-  
29 threatened self-introduced congeneric poaka (Aotearoa New Zealand population of pied stilts,  
30 *Himantopus himantopus leucocephalus*), yet genetic analyses with a limited set of  
31 microsatellite markers revealed no evidence of introgression of poaka genetic material in  
32 kakī, excluding one individual. We use genomic data for ~63% of the wild adult kakī  
33 population to reassess the extent of introgression resulting from hybridisation between kakī  
34 and poaka. Consistent with previous genetic analyses, we detected no introgression from

35 poaka into kakī. These collective results indicate that, for kakī, existing microsatellite  
36 markers provide a robust, cost-effective approach to detect cryptic hybrids. Further, for well-  
37 differentiated species, the use of genomic markers may not be required to detect admixed  
38 individuals.

39

## 40 **2 Introduction**

41

42 Growing genomic evidence indicates that interspecific hybridisation (hereafter, hybridisation)  
43 has been integral in the evolutionary history of many species (e.g., North American wolves,  
44 vonHoldt et al., 2011, 2016, but also see Hohenlohe et al., 2017; Rutledge et al., 2015),  
45 challenging existing perceptions of the intrinsic value of hybrids and hybrid species, and  
46 further highlighting the complexity of conservation policy relating to them (Haig &  
47 Allendorf, 2006; Jackiw et al., 2015; Wayne & Shaffer, 2016). Nevertheless, potential  
48 tradeoffs resulting from conservation management of hybrids and hybridisation – especially  
49 recent human-induced hybridisation between threatened endemic and non-threatened non-  
50 endemic congeners – warrants careful ethical and practical consideration, balancing  
51 conservation priorities alongside the ecological, social, and economic costs-benefits of  
52 hybrids (e.g., Hamilton & Miller, 2016; Estévez et al., 2015; Schlaepfer et al., 2011). From a  
53 conservation perspective, threatened endemic species are valued over non-threatened non-  
54 endemic species due to their rarity and their known (or perceived) ecological importance,  
55 which generally leads to ethical and moral obligations to conserve them, especially if they  
56 are also culturally significant species (Booth et al., 2011; Courchamp et al., 2006; Maguire &  
57 Justus, 2008; Richardson & Loomis, 2009). However, the potential conservation value of  
58 hybrids should not be viewed as static, especially as altered species ranges increase the  
59 prevalence of hybrids (Chunco, 2014), and the inclusion of genomic data continues to  
60 improve our understanding of the impacts of hybridisation (vonHoldt et al., 2018).

61

62 Regardless of the perceived value of hybrids, hybridisation negatively impacts threatened  
63 species recovery through the misplaced reproductive efforts of interspecific breeding  
64 (Allendorf et al., 2001). This can reduce the reproductive outputs of species of conservation  
65 concern by demographic swamping (Allendorf et al., 2001; Wolf et al., 2001). Another  
66 potential impact of hybridisation is introgression, where subsequent backcrossing to the  
67 parental species incorporates genetic material from one species into the genome of another  
68 (Rhymer & Simberloff, 1996). Negative impacts of introgression may include outbreeding

69 depression, where the breakdown of coadapted gene complexes or the introduction of  
70 maladaptive traits results in the decreased fitness of hybrid offspring (Arnold, 1997;  
71 Edmands, 2007; Lynch, 1991), and, at its most extreme, may result in extinction-by-  
72 hybridisation (Allendorf et al., 2001; Fitzpatrick et al., 2010; Quilodr an et al., 2018; Rhymer  
73 & Simberloff, 1996; Riley et al., 2003; Taylor et al., 2006; Todesco et al., 2016).

74

75 Genetic tools may be employed to assist conservation management programmes in assessing  
76 the extent and impacts of hybridisation, and for identification of cryptic hybrid offspring  
77 morphologically indistinguishable from parental types (Chan et al., 2006; Ma & Lambert,  
78 1997; Mili an-Garc a et al., 2015; Pierpaoli et al., 2003). However, to date, most conservation-  
79 relevant studies have used a small number of genetic markers (e.g., microsatellites) that may  
80 not be representative of genome-wide diversity, particularly among threatened species where  
81 population bottlenecks have left populations genetically depauperate (Taylor, 2015; Taylor et  
82 al., 2015; V ali et al., 2008). Over the past decade, genomic sequencing technologies have  
83 progressed, and rapidly declining costs now enable the sequencing and assembly of complete  
84 genomes for threatened non-model organisms (e.g., Li et al., 2010; Sutton et al., 2018), or the  
85 generation of thousands of genomic markers (i.e., single-nucleotide polymorphisms (SNPs))  
86 distributed throughout the genome via reduced-representation sequencing, sufficient to  
87 facilitate population-level estimation of metrics including diversity, relatedness, population  
88 structure, and introgression in an efficient, cost-effective manner (Ba et al., 2017; Chen et al.,  
89 2016; Peek et al., 2019; Rexer-Huber et al., 2019; Rick et al., 2019). Population-level  
90 reduced-representation sequencing (including restriction-enzyme associated DNA sequencing  
91 (RADseq), double-digest RADseq (ddRADseq), and genotyping-by-sequencing (GBS)) is an  
92 approach that can produce thousands of variant sites for high-resolution population genomic  
93 analyses (Davey et al., 2011; Davey & Blaxter, 2010; Elshire et al., 2011; Narum et al., 2013)  
94 and as such has wide applicability for conservation (K. R. Andrews et al., 2016; Seabury et  
95 al., 2011; Wright et al., 2019). Large genomic marker sets are expected to provide greater  
96 power to resolve questions relating to hybridisation and introgression (similar to that  
97 observed when estimating genetic diversity and differentiation (Fischer et al., 2017) and  
98 relatedness (Galla et al., 2020)), but studies comparing genomic data with previous genetic  
99 analyses related to hybridisation in a conservation context are thus far limited (Table 1). Here  
100 we demonstrate the utility of genomic tools for assessment of the impacts of hybridisation in  
101 a critically endangered wading bird.

102

103 One of the world's rarest bird species, the Aotearoa New Zealand kakī (black stilt,  
104 *Himantopus novaezelandiae*) provides a classic example of a threatened species affected by  
105 human-induced hybridisation (BirdLife International, 2018; Robertson et al., 2016).  
106 Anthropogenic impacts resulted in population decline during the 1900s, with numbers falling  
107 to approximately 23 individuals comprising a single population in Te Manahuna/the  
108 Mackenzie Basin in 1981 (Pierce, 1984b; Steeves et al., 2010). Adaptive conservation  
109 management of kakī, including predator control throughout Te Manahuna and a programme  
110 of captive breeding and rearing for translocation have been integral to increase the kakī  
111 population to 169 wild adults in 2020 (Hagen et al., 2011; Heezik et al., 2005; Keedwell et  
112 al., 2002; Maloney & Murray, 2001; Reed et al., 1993; Steeves et al., 2010). Along with  
113 predation and altered habitat availability, interspecific hybridisation may pose a threat to  
114 species recovery (Steeves et al., 2010). The Aotearoa New Zealand population of congeneric  
115 Australian pied stilts (hereafter referred to as poaka; *Himantopus himantopus leucocephalus*)  
116 self-introduced from Australia at least 200 years ago, and anthropogenic impacts facilitated  
117 expansion of the species' range (Pierce, 1984b). Limited mate choice and a male sex bias  
118 among kakī at the peak of kakī decline promoted hybridisation between kakī and poaka,  
119 producing viable, fertile hybrid offspring (Pierce, 1984a; Steeves et al., 2010).  
120  
121 Current kakī conservation management policies reflect the conservation value of non-  
122 admixed kakī, which are individuals with pure-black plumage that genetically assign to kakī  
123 based on a small set of mitochondrial and microsatellite markers (Maloney & Murray, 2001;  
124 Reed et al., 1993; Steeves et al., 2010). Steeves et al. (2010) confirmed the genetic  
125 distinctiveness of kakī, and found no evidence of introgression from poaka except in a single  
126 individual. This finding was attributed to reduced fitness of female hybrid offspring,  
127 combined with an ephemeral skewed sex ratio and active management to exclude hybrids  
128 (Steeves et al., 2010). However, Steeves et al. (2010) acknowledged that the small marker set  
129 used may not be representative of genome-wide variation, and thus may lack the power to  
130 detect low levels of introgression resulting from past hybridisation (see also Brumfield,  
131 2010).  
132  
133 Here, we use population-level GBS and a reference-guided approach to SNP discovery for  
134 kakī, known hybrids, poaka, and Australian pied stilts. We infer the genomic extent and  
135 pattern of introgression due to hybridisation between kakī and poaka in the contemporary  
136 kakī population, as compared with that of previous genetic analyses. Determining the utility

137 of genetic and genomic markers for detection of introgressive hybridisation is essential not  
138 only for the conservation of kakī, but also for detecting hybridisation in threatened species  
139 more broadly.

140

### 141 **3 Materials and Methods**

142

#### 143 3.1 Sample collection and DNA extraction

144

145 Following Steeves et al., 2010, individuals sampled herein were grouped by plumage  
146 morphology according to the nodes defined by (Pierce, 1984a) as used by the Department of  
147 Conservation's Kakī Recovery Programme. Poaka and pied stilts (plumage nodes A–C2;  
148 Pierce, 1984a) were labelled 'pied', completely black node J individuals were labelled 'kakī',  
149 and individuals of intermediate plumage (nodes D1–I/J) or known hybrid parentage were  
150 labelled 'hybrid' (Supplementary Table 1). Extracted genomic DNA (gDNA) was available  
151 for 80 stilt samples including kakī, Australian pied stilts and poaka, and hybrids for previous  
152 genetic analyses.

153

154 We extracted gDNA from an additional 155 feather samples collected as part of regular  
155 handling practices for kakī under Aotearoa New Zealand's Department of Conservation  
156 (DOC) ethics approvals (AEC #283) at the DOC's Kakī Recovery Programme, Twizel, and  
157 the Isaac Conservation and Wildlife Trust kakī captive rearing facility, Christchurch,  
158 Aotearoa New Zealand. Pedigree information is recorded for all kakī individuals as part of  
159 routine Kakī Recovery Programme management, extending up to seven generations. In  
160 addition, blood samples were collected as part of routine health checks from two Australian  
161 pied stilts at Adelaide Zoo (provided under a Royal Zoological Society of South Australia  
162 Specimen Licence Agreement; Import Permit #2016061954), two node B poaka from  
163 Auckland Zoo (under Auckland Zoo animal ethics approval), along with a tissue sample from  
164 one poaka from Hawke's Bay, North Island (Figure 1). Poaka from the North Island were  
165 preferentially sampled due to a low likelihood of recent contact with kakī, minimising the  
166 chance of these individuals having recent hybrid ancestry. We extracted gDNA from all  
167 samples using a Thermo Scientific™ MagJET™ Genomic DNA kit, following Protocol E  
168 (manual genomic DNA purification from up to 20 mg tissue). We quantified gDNA for all  
169 samples using a NanoDrop™ 8000 Spectrophotometer to assess viability for GBS. GBS  
170 guidelines from our sequencing provider (AgResearch Ltd., Mosgiel, Aotearoa New Zealand)

171 recommended a total of 1 µg of DNA per sample at a concentration of 80–150 ng/µL, and  
172 260/280 and 260/230 ratios of 1.80–2.00 and > 1.0 respectively.

173

### 174 3.2 Genotyping-by-sequencing

175

176 Among all available DNA extracts, 145 samples (130 kakī, six pied stilts, and nine hybrids)  
177 had DNA of sufficient quality and quantity as per GBS recommendations. This included 74  
178 males and 62 females, with nine individuals of unknown sex (Supplementary Table 1). We  
179 prepared two 96-well plates of samples for GBS, containing 145 samples, two negative  
180 controls (DNA-free controls) per plate, and three positive controls (replicate samples) across  
181 plates. We diluted samples with gDNA concentration > 150 ng/µL to 100 ng/µL, and  
182 supplied ~1 µg of DNA for all samples. GBS optimisation and sequencing was conducted by  
183 AgResearch Ltd.. The optimised GBS protocol used a double-digest with restriction enzymes  
184 PstI-MspI. A single library was generated for all 145 samples and controls with a fragment  
185 length filter of 193–500 bp including adapter sequences. This library was sequenced on one  
186 lane of Illumina HiSeq 2500 v4 sequencing for 101 cycles.

187

### 188 3.3 Reference-guided variant discovery

189

190 We assessed sequence quality with FastQC v0.11.5 (Andrews, 2010), and confirmed absence  
191 of contamination in negative controls through BLAST searches against the nucleotide  
192 database (Altschul et al., 1990). To provide accurate SNP discovery, we mapped GBS data to  
193 the kakī reference genome (Galla et al., 2019). We demultiplexed and filtered raw sequences  
194 with Sabre v1.0 (Joshi, 2013) and adapter trimmed with Cutadapt v1.17 (Martin, 2011). We  
195 indexed genomes with BWA v0.7.17 (Li & Durbin, 2009), and mapped the processed GBS  
196 reads to the genomes with BWA-MEM. We pre-processed the mapped reads for variant  
197 discovery by adding read-group information with SAMtools, marking duplicates with Picard  
198 v2.18.0 (Picard Toolkit, 2019), and realigning indels with the Genome Analysis Toolkit  
199 (GATK) v3.5 (McKenna et al., 2010).

200

201 We compared five independent pipelines for reference-guided variant discovery. The  
202 ‘GATK’ pipeline used GATK’s HaplotypeCaller and GenotypeGVCFs to call variants. The  
203 ‘Samtools’ pipeline used SAMtools v1.7 mpileup and BCFtools v1.6 variant caller (H. Li,  
204 2011). The ‘Platypus’ pipeline used the callVariants tool in Platypus v0.8.1 (Rimmer et al.,



205 2014) with minimum mapping quality of 20, minimum base quality of 20, minimum depth to  
206 call a variant of 2, and flag to generate indels set. The ‘Stacks’ pipeline implemented Stacks  
207 v2.2 (Catchen et al., 2013) reference-guided pipeline with default parameters. The mapped  
208 sequence reads were passed as input to GATK, Samtools, Platypus, and Stacks. The fifth  
209 pipeline, ‘Tassel’, was run independently with the raw multiplexed GBS data passed as input  
210 to TASSEL5-GBS2 v5.2.39 (Glaubitz et al., 2014). Tags were extracted from the data set  
211 with a minimum quality score of 10, and then passed to BWA v0.7.12 for alignment against  
212 the reference genome. The resulting SAM file was passed back to TASSEL5-GBS2 for  
213 variant discovery with default settings, and all SNPs with quality  $\geq 10$  were retained.

214

### 215 3.4 Variant processing

216

217 By using a reference-guided approach, genomic location data was available for all variants,  
218 and so we could compare variants produced across the five pipelines using VCFtools v0.1.15  
219 (Danecek et al., 2011) *vcf-compare* following standardisation of variant call format files with  
220 *vcf-convert*. We visualised the intersections of common variants among pipelines with the  
221 package UpSetR (Conway et al., 2017; Lex et al., 2014) implemented in R v3.5.1 (R Core  
222 Team, 2018). To improve confidence that the SNPs discovered were true SNPs rather than  
223 the result of sequencing or mapping error, we produced a single variant set comprising all  
224 variants detected via at least three pipelines from the intersections of variants common to  
225 multiple pipelines generated using VCFtools *vcf-isec*, *vcf-merge* and *vcf-sort*. To produce a  
226 set of biallelic SNPs to investigate admixture between kakī and poaka, we removed indels  
227 and multiallelic SNPs from the composite variant set using VCFtools. To confirm absence of  
228 contamination and replicability of lab processes, preliminary filtering tests and downstream  
229 analyses had retained negative and positive controls, and once confirmed, these controls were  
230 removed. We then excluded sites with  $> 10\%$  missing data, a minor allele frequency  $< 0.01$ ,  
231 and a minimum quality score  $< 20$ . SNPs with mean depth over all individuals between  $5\times$   
232 and  $200\times$  were retained, and individuals with  $> 50\%$  missing data across all sites were  
233 excluded (final  $n = 140$ ). Due to the putative nature of the sex chromosomes in the kakī  
234 reference genome, preliminary analyses were conducted both including and excluding SNPs  
235 located on putative sex chromosomes. No difference in the extent of introgression was  
236 observed between approaches (data not shown), so we conservatively excluded SNPs located  
237 on putative sex chromosomes.

238

### 239 3.5 Discriminant Analysis of Principal Components

240

241 In an exploratory multivariate approach to population clustering, we conducted Discriminant  
242 Analysis of Principal Components (DAPC) with adegenet v2.1.1 (Jombart, 2008; Jombart et  
243 al., 2010; Jombart & Ahmed, 2011; Jombart & Collins, 2015b) in R v3.5.1. DAPC attempts  
244 to partition variance in a between-group and within-group manner to maximise the  
245 discrimination between groups. Using a multivariate approach allows for fine-scale  
246 assessment of population structure, without relying on population genetic models, and so is  
247 independent of the assumptions of HWE or linkage equilibrium associated with population  
248 structuring analyses (Jombart et al., 2010). DAPC uses *a priori* information of the number of  
249 clusters present in the data set, and then assesses the discriminants that best explain those  
250 clusters. To prevent overfitting of the data, we optimised DAPC parameters using the  
251 Bayesian Information Criterion (BIC) and *a*-scores, and performed cross-validation following  
252 (Jombart & Collins, 2015a). The *a*-score measures the trade-off between the power of  
253 discrimination and potential to overfitting the data, using a randomisation of the data to  
254 determine when cluster assignment is successful due to the analysis or due to random  
255 discrimination, and penalises the reassignment score by the number of retained principal  
256 components (PCs). Cross-validation confirmed the appropriate numbers of PCs, using a  
257 random seed to produce 1,000 replicate runs with a training set of 80% of the data across up  
258 to sixty PCs. The accuracy of the retained PCs was then tested with the remaining 20% of the  
259 data, and the PCs retained for the final DAPC were based on that which produced the lowest  
260 mean squared error and highest mean success. The optimised DAPC analysis was visualised  
261 to infer species differentiation and individual clustering.

262

### 263 3.6 Analysis of introgression with ADMIXTURE

264

265 To estimate individual assignment to population clusters and to detect introgression, we  
266 analysed each SNP set with a maximum likelihood method implemented in ADMIXTURE  
267 v1.3.0 (Alexander et al., 2009). To minimise stochasticity across multiple runs, we conducted  
268 100 iterations of ADMIXTURE analysis with each SNP set for  $K = 1-6$ , where  $K$  represents  
269 the hypothesised number of population clusters, using a random seed, ten-fold CV, and with  
270 point estimation terminating when the change in log-likelihood increased by  $< 0.0001$ . The  
271 range of  $K$ -values was selected independently of the results of DAPC analysis, allowing for  
272 differentiation between the two species (kakī and pied stilts), along with potential population



273 structuring among kakī, or differentiation between Australian pied stilts and poaka. To  
274 determine the most appropriate value of  $K$  for each SNP set, we averaged CV error across the  
275 100 iterations and visualised the results, with the lowest CV error representing the most likely  
276  $K$ . We visualised mean assignment probabilities ( $Q$ -values) across all iterations with  
277 pophelper v2.3.0 (Francis, 2017) in R v3.5.1. We used pophelper for file conversion for input  
278 to CLUMPP to handle label switching. Consensus  $Q$ -values for each individual were  
279 calculated with the Greedy algorithm over 100 iterations in CLUMPP vMacOSX 1.1.2  
280 (Jakobsson & Rosenberg, 2007), and we visualised the results with pophelper in R v3.5.1.  
281 We manually assessed the final  $Q$ -matrix for all individuals using the predefined assignment  
282 threshold to assign individuals as kakī.

283

### 284 3.7 Combining pedigree data with genomic population assignment data

285

286 Following all admixture and population clustering analyses, only six node J kakī individuals  
287 were identified with  $< 100\%$  kakī assignment. A small number of hybrid individuals are  
288 included among the founders in the kakī pedigree (Galla et al., 2020). To determine whether  
289 these assignment probabilities could be attributed to known hybrid ancestry ( $< 7$  generations  
290 deep), we used the kakī pedigree (Galla et al., 2020) to assess the ancestry of these six  
291 individuals.

292

## 293 **4 Results**

294

295 Following a reference-guided multi-pipeline approach to SNP discovery and filtering for 145  
296 stilts, a total of 140,948 SNPs were used in downstream analyses which detected no evidence  
297 of introgression from poaka into kakī. Of the 250 gDNA samples available, 145 extractions  
298 contained DNA of the required quantity and quality for GBS, including 66 of the 106  
299 (63.2%) adults alive in the wild kakī population when this study began in 2017. GBS of the  
300 pooled set of kakī, Australian pied stilts and poaka, and interspecific hybrids produced a total  
301 of 303,639,199 raw sequences with length 35–101 bp and high sequence quality.

302 Demultiplexing produced an average of  $2,024,530 \pm \text{SD } 1,031,208.21$  reads per sample  
303 (Supplementary Table 2), and no samples failed to sequence. Negative controls produced a  
304 low number of reads (mean =  $2,585 \pm \text{SD } 1554.76$  reads per negative). Contamination checks  
305 of negative controls produced no matches to the BLAST nucleotide database.

306

#### 307 4.1 Variant discovery and filtering

308

309 Mapping of trimmed, filtered reads for all samples to the reference kakī genome produced an  
310 average of  $1,138,306.05 \pm \text{SD } 597,406.95$  mapped reads per individual (Table 2). This  
311 represents an average of 85.4% reads per sample successfully mapped to the reference  
312 genome.

313

314 Variant calling with GATK produced the fewest variants (35,441), while SAMtools produced  
315 the most (488,940, Fig. 2). There were 177,437 variants common to  $\geq 3$  pipelines (Fig. 3).  
316 Despite GATK producing the fewest variants among the five pipelines, the majority  
317 (92.68%) were retained in the common variant set. SAMtools had the lowest proportion  
318 (35.14%) of discovered variants retained in the common set. A total of 15,851 SNPs  
319 remained after filtering. The five individuals that had produced the fewest raw sequences  
320 (26,725–313,884 reads) were subsequently excluded due to high ( $> 50\%$ ) levels of missing  
321 data. The total genotyping rate was 96.91%.

322

323 Exploratory statistics indicated an even distribution of SNPs throughout the genome, with a  
324 mean density of  $0.014 \pm \text{SD } 0.158$  SNPs/kb (Table 3). Mean depth of coverage per individual  
325 was  $11.663\times$ . Kakī were well-differentiated from pied stilts with mean  $F_{ST} = 0.622$  (Table 3).  
326 Per-population summary statistics identified pied stilts as having higher diversity in terms of  
327 nucleotide divergence, a greater number of variant sites, and more private alleles than either  
328 kakī or hybrids (Table 4). Kakī displayed the lowest nucleotide diversity and fewest  
329 polymorphic sites among the predefined groups (Table 4).

330

#### 331 4.2 Discriminant Analysis of Principal Components

332

333 DAPC analysis identified Australian pied stilts and poaka as clustering distinctly from kakī,  
334 with hybrids intermediate to the two species, though grouping more closely with kakī than  
335 poaka (Fig. 3). Two node I/J hybrid individuals (DNA777 and DNA779) were found to  
336 cluster with kakī.

337

#### 338 4.3 ADMIXTURE analysis of introgression

339

340  $K = 2$  was indicated as the most likely number of clusters for ADMIXTURE analysis based  
341 on CV error values, consistent with previous genetic results confirming taxonomic  
342 delimitation (Steeves et al., 2010), and concordant with the results of DAPC identifying two  
343 distinct clusters, and therefore only results for  $K = 2$  for are reproduced here. All individuals  
344 categorised as kakī (node J individuals) had assignment probabilities to the kakī cluster above  
345 the pre-defined 95% threshold, and only six individuals were assigned as kakī with  
346 probability  $< 100\%$  (kakī mean  $Q = 0.9992 \pm \text{SE } 0.0009$ ; Fig. 4, Table 5, Supplementary  
347 Table 3). Both Australian pied stilts and the poaka individual Poaka1 were assigned with  
348 100% probability to the pied stilt cluster. Assignment probabilities to the kakī cluster for  
349 hybrids ranged from 23.01% (DNA2113) to 100% (DNA777 and DNA779; hybrid mean  $Q =$   
350  $0.6399 \pm \text{SD } 0.0175$ ; Supplementary Table 3).

351

#### 352 4.4 Incorporating pedigree data with results of genomic analysis of introgression for 353 individuals of interest

354

355 All node J individuals were assigned as kakī with probabilities above the 95% threshold.  
356 Pedigree assessment revealed only 17 kakī individuals included in this study had no recorded  
357 hybrid ancestry (i.e., all of their recorded ancestors were individuals with plumage node J  
358 representing completely black birds). Among the node J kakī individuals identified as having  
359 95.00–99.99% probability of assignment to the kakī cluster, all individuals had at least one  
360 node I or I/J individual in their recorded ancestry. Individual DNA897 had the most recent  
361 hybrid ancestry, with an I/J ancestor three generations deep. Individual DNA1252 had the  
362 lowest probability of assignment to the kakī cluster among all kakī (Table 5), and while this  
363 individual did not have more frequent or more recent recorded hybrid ancestry than other  
364 kakī here, there is no recorded ancestry for the paternal lineage. The mother of individual  
365 DNA1252 was included in sequencing and analyses, and was not identified as having any  
366 hybrid ancestry, suggesting a paternal lineage origin for the relatively lower probability of  
367 assignment as kakī. Individual DNA1694 has a relatively deep pedigree among kaki,  
368 spanning seven generations. This individual also has the most frequent incidence of recorded  
369 hybrid ancestry among these individuals, with a node I/J ancestor four generations deep, three  
370 further I/J ancestors six generations deep, and a node I ancestor seven generations deep. The  
371 two hybrid individuals that were consistently assigned to the kakī cluster were siblings  
372 DNA777 and DNA779, with a node I/J mother, and a node I/J ancestor three generations  
373 deep.

374

## 375 **5 Discussion**

376

377 With the development of genomic sequencing and associated methodologies, conservation  
378 management of threatened species can now incorporate high-resolution genomic tools to  
379 more robustly explore threats to species recovery, such as anthropogenic hybridisation  
380 (Allendorf et al., 2010; Avise, 2010; Ekblom & Galindo, 2011; Gompert, 2012; Primmer,  
381 2009). As discussed by (Allendorf et al., 2001), hybridisation of a threatened species with a  
382 more common non-native species can result in the formation of a hybrid swarm, where  
383 widespread introgression results in the loss of genetic integrity of the threatened species.  
384 Studies to date indicate that while using a small number of genetic markers can provide  
385 important baseline data for conservation management (e.g., genetic sexing, (Steeves et al.,  
386 2010); brood parasitism, (Overbeek et al., In Press; Overbeek et al., 2017), such marker sets  
387 have proved less robust than genomic markers for analyses of parentage (Tokarska et al.,  
388 2009), relatedness (Galla et al., 2020), intraspecific population structure (McCartney-Melstad  
389 et al., 2018), and introgression (Parejo et al., 2018).

390

### 391 5.1 Impacts of hybridisation in stilts

392

393 All 130 kakī genotyped here—representing 63% of the contemporary adult population at the  
394 time of sampling—were assigned as kakī with > 95% probability. These data confirm that the  
395 genetic integrity of kakī has been maintained despite hybridisation with poaka, and are  
396 concordant with previous genetic analysis (Steeves et al., 2010).

397

398 No individuals with pure-black plumage (node J) were identified as cryptic hybrids, with all  
399 individuals assigned to the kakī cluster with probabilities above the predefined 95%  
400 threshold. Among the sampled individuals, 29 kakī had at least one hybrid ancestor three  
401 generations in the past, and these ancestors were all dark hybrids (node I or I/J). No kakī  
402 individuals included in this study had recorded hybrid ancestors with plumage lighter than  
403 node I. These results indicate that with every generation of kakī backcrossing following  
404 hybridisation, the proportion of introgressed genes is increasingly likely to be replaced by  
405 kakī genetic material. Indeed, two individuals identified as hybrids (DNA777 and DNA779)  
406 with a node I/J mother were assigned as kakī with 100% probability across all analyses. This  
407 may indicate that even a small number of generations of backcrossing with kakī can rapidly

408 overwhelm introgression from poaka. The current kakī recovery strategy excludes node I/J  
409 birds from active management (i.e., excluding any offspring of node I/J birds from the  
410 captive rearing programme) based on plumage (Steeves et al., 2010).

411

412 The finding of no introgression from poaka to kakī likely results from a combination of  
413 factors. First, the management strategy enacted by the DOC's Kakī Recovery Programme to  
414 maintain kakī genetic integrity has successfully minimised opportunities for hybridisation  
415 between these species. This management has been responsive to the results of genetic  
416 analysis that led to the exclusion of all non-node J individuals from conservation  
417 management (Steeves et al., 2010). Intensive population monitoring of breeding pairs and  
418 assessment of putative hybrids using the microsatellite panel has enabled practitioners to  
419 break up mixed pairs (allowing kakī to re-pair with kakī) and exclude hybrids from the  
420 captive breeding programme (Maloney & Murray, 2001). Ongoing kakī recovery has resulted  
421 in a relatively balanced sex ratio in the wild, and combined with the strong positive  
422 assortative mating of kakī, has minimised the likelihood of kakī breeding with non-kakī  
423 (Steeves et al., 2010). Moderate outbreeding depression and stochastic processes have also  
424 contributed to reduce the reproductive success of hybrids (Steeves et al., 2010), further  
425 limiting the likelihood of introgressed material to be maintained in the population.

426

## 427 5.2 Implications for kakī conservation

428

429 The results presented here provide evidence that active conservation management designed to  
430 minimise hybridisation can be effective in maintaining species integrity, and support the  
431 ongoing management strategy of poaka and hybrid exclusion from the captive management  
432 programme based on the results of genetic analysis (Steeves et al., 2010). The goals of  
433 current kakī management to maintain the genetic integrity of the species are appropriate due  
434 to the strong differentiation between species observed here, reduced fitness of hybrid  
435 offspring, and the previous observation of moderate levels of genetic diversity among kakī  
436 compared with other threatened Aotearoa New Zealand endemic birds (Steeves et al., 2010).  
437 Despite the increased resolution of genomic data, when individuals with anomalous plumage  
438 are observed in the captive breeding and rearing facility, microsatellite genotyping remains  
439 the most cost- and time-efficient, low-complexity method for confirming species status  
440 (Table 6; Overbeek et al., In Press; Overbeek et al., 2017), and this may be the case for other  
441 species threatened by hybridisation. Evidence of reduced fitness of hybrid offspring (Steeves

442 et al., 2010) suggests the genetic integrity of kakī will continue to be valued over any  
443 potential gain in genetic diversity that may be facilitated through managed introgression (e.g.,  
444 the inclusion of cryptic hybrids). Further, the lack of cryptic hybrids in the contemporary kakī  
445 population indicates maintaining the genetic integrity of kakī is possible (Steeves et al., 2010;  
446 this study).

447

448 Under optimal circumstances, kakī recovery will continue, leading to increased numbers of  
449 kakī within Te Manahuna in the short-term, and the potential for natural expansion beyond  
450 the basin in the long-term. In the short-term recovery scenario, the success of the  
451 conservation breeding and rearing programme to date may mean that active management of  
452 the species could be scaled back. This may see a reduction in the number of adult kakī  
453 maintained in captivity for breeding, although management of wild nests, including egg-  
454 collection, artificial incubation and captive rearing are likely to continue to maximise  
455 population growth while kakī remain critically endangered. As kakī are one of the few  
456 threatened Aotearoa New Zealand birds to have maintained a population on the mainland  
457 despite the presence of invasive predators, and are capable of travelling long distances, active  
458 translocations are unlikely to be necessary to support natural expansion beyond Te  
459 Manahuna. In addition, it is unlikely that active management of any such expansion would be  
460 feasible. As such, management to minimise the likelihood of hybridisation within Te  
461 Manahuna will continue, but with the wide distribution of poaka across the country, future  
462 expansion into areas with high poaka densities may result in the increased prevalence of  
463 hybridisation that could once again compromise genetic integrity. Therefore, maintaining the  
464 integrity of the source population within Te Manahuna should be of high priority for  
465 conservation.

466

### 467 5.3 Impacts of hybridisation on poaka

468

469 The identification of poaka with pied stilt assignment probabilities < 95% may be a result of  
470 initial small population size on arrival to Aotearoa New Zealand, and subsequent  
471 hybridisation with kakī prior to species decline. Kakī only occur as vagrants in the North  
472 Island of Aotearoa New Zealand, observed in very low numbers since at least the 1950s  
473 (Pierce, 1984b). Given the limited contact between kakī and poaka in the North Island in  
474 recent years, we expected the poaka samples sourced from the North Island to produce  
475 assignment probabilities similar to those of the Australian pied stilts. However, both



476 individuals sourced from Auckland Zoo were assigned to the pied stilt cluster with < 95%  
477 probability. The only North Island individual with an assignment probability comparable to  
478 those of the Australian pied stilts was the individual from Hawke's Bay (Poaka1). This  
479 suggests that hybridisation early in the establishment of poaka may have resulted in  
480 introgression of kakī genetic material into an initially small poaka population that was not  
481 frequently supplemented by a substantial number of new immigrants, with introgressed  
482 material maintained in the expanding population despite subsequent backcrossing. Kakī  
483 introgression into poaka is supported by the observation of node A poaka having tarsal  
484 lengths outside the range observed among Australian pied stilts with no history of  
485 hybridisation, and poaka presenting a greater proportion of black plumage than is typical  
486 among Australian pied stilts (Pierce, 1984a).

487

#### 488 5.4 Comparison of genetic and genomic approaches to introgression analysis

489

490 Reduced-representation sequencing approaches have proven to be efficient, robust, and cost-  
491 effective for variant discovery (Andrews et al., 2016; Davey et al., 2011; Elshire et al., 2011;  
492 Peterson et al., 2012). Here GBS was used as a relatively cost-effective approach to  
493 population-level genomic sequencing of non-model species, producing a set of species-  
494 discriminating SNPs. Initial development of a GBS system is markedly less expensive than  
495 development of a microsatellite panel (3000 GBP for GBS development using 94 samples in  
496 this study in 2018 compared with 5000 GBP development and testing of a microsatellite  
497 panel of approximately ten loci using 94 samples based on the estimate of Galla et al. (2016;  
498 Table 6). However, ongoing costs of the microsatellite panel per sample remain considerably  
499 lower than that of GBS (10 GBP/sample for a microsatellite panel compared with 30  
500 GBP/sample for GBS; Table 6), and the time required from individual sampling to  
501 completion of analysis is substantially reduced. There are also fewer barriers to analysing  
502 microsatellite data (e.g., microsatellite genotyping and analyses can be conducted on a  
503 standard desktop computing system compared with the requirement of a high-performance  
504 computing system with access to and experience with a variety of bioinformatic tools  
505 necessary to analyse GBS data, Table 6). While the ability to more readily characterise  
506 genome-wide variation will make a genomics approach desirable for many conservation  
507 projects, the associated costs may limit uptake, especially when providing data for time-  
508 dependent decisions. Despite the increasing uptake of genomics approaches to answer  
509 questions pertinent to conservation management (Galla et al., 2016), the current greater costs

510 and other transitional challenges (e.g., bioinformatic expertise) will likely maintain the  
511 conservation genomics gap for at least some species for some time yet.

512

513 For kakī, the nature of GBS as a reduced-representation approach means that despite the large  
514 increase in data compared with the eight microsatellite loci used previously, this still only  
515 represents < 1% of the 1.1 Gb kakī genome (Galla et al., 2019). Declining costs associated  
516 with whole-genome resequencing have already overtaken reduced-representation sequencing.  
517 For example, combined with the kakī pedigree, whole-genome resequencing data is being  
518 used to inform the kakī conservation breeding programme (Galla et al., 2020). Thus, should  
519 hybridisation become a significant threat to kakī recovery in the future, or should the  
520 conservation value of cryptic hybrids be reconsidered, then a comparison of GBS with  
521 whole-genome resequencing data may be useful.

522

## 523 **6 Conclusions**

524

525 Studies comparing the utility of genetic and genomic approaches for generating estimates of  
526 population genetic diversity and differentiation indicate that large SNP sets generally  
527 outperform the small microsatellite sets typically used in conservation genetic studies (Hauser  
528 et al., 2011; Hohenlohe et al., 2013; Santure et al., 2010; Weinman et al., 2015). Thus, re-  
529 examining the extent of introgression between critically endangered kakī and non-threatened  
530 congeneric poaka using a genomic approach was essential to ascertain the efficacy of  
531 conservation management aimed at maintaining the genetic integrity of kakī. While results are  
532 concordant between genetic and genomic approaches for kakī and poaka, this may not be the  
533 case for other species, particularly when hybridisation may be widespread (e.g., hybridisation  
534 between koloa maoli/Hawaiian duck (*Anas wyvilliana*) and the invasive mallard (*A.*  
535 *platyrhynchos*; Wells et al., 2019). Thus, we recommend that when genetic assessment has not  
536 been conducted, or there is uncertainty as to whether genetic data have adequately captured the  
537 impact of hybridisation, a genomic approach should be used. Further, we suggest that when  
538 genetic and genomic results are concordant – which we anticipate will be more likely for well-  
539 differentiated species – conservation managers can confidently continue to use genetic tools,  
540 particularly when these remain more efficient and cost-effective.

541

## 542 **7 Data accessibility**

543

544 Kakī are a taonga (treasured) species for Māori (the Indigenous people of Aotearoa New  
545 Zealand) and as such, genomic data derived from kakī are also recognised as taonga in their  
546 own right. Due to the tapu (sacred) nature of these data, the data presented here are hosted on  
547 a password-protected database at [www.uconsert.org/data/](http://www.uconsert.org/data/), and will be made available at the  
548 discretion of the kaitiaki of the iwi (tribes) and hapū (subtribes) associated with kakī. These  
549 data include raw genotyping-by-sequencing data, and the VCF comprising the unfiltered SNP  
550 set.

551

## 552 **8 Acknowledgements**

553

554 We extend our thanks to the tangata whenua who are kaitiaki for kakī, namely Te Rūnanga o  
555 Ngāi Tahu, Te Ngāi Tūāhuriri Rūnanga, Te Rūnanga o Arowhenua, Te Rūnanga o Waihao,  
556 and Te Rūnanga o Moeraki. This research was funded by a Royal Society of New Zealand  
557 Rutherford Discovery Fellowship to MK, and NJF was supported by a University of Otago  
558 Doctoral Scholarship. We are grateful to the Aotearoa New Zealand Department of  
559 Conservation's Kakī Recovery Team, Richard Jakob-Hoff at Auckland Zoo, David  
560 McLelland at Adelaide Zoo, and John Berry for assisting with provision of kakī, Australian  
561 pied stilt, poaka, and interspecific hybrid samples for use in this project. We also thank Dr  
562 Hugh Cross for additional bioinformatics assistance, and Jana Wold for helpful feedback on  
563 an early draft of the manuscript.

564

## 565 **9 Declaration of interest:**

566 The authors declare that they have no known competing financial interests or personal  
567 relationships that could have appeared to influence the work reported in this paper.

568

## 569 **10 Funding**

570

571 This research was funded by a Royal Society of New Zealand Rutherford Discovery  
572 Fellowship to MK, and NJF was supported by a University of Otago Doctoral Scholarship.

573

## 574 **11 Role of funding**

575

576 The funding sources had no role in the study design; in the collection, analysis and  
577 interpretation of data; in the writing of the report; or in the decision to submit the article for  
578 publication.

579

## 580 **12 Credit authorship contribution statement**

581

582 Natalie J. Forsdick: Conceptualization, Data curation, Formal analysis, Methodology, Project  
583 administration, Visualization, Writing - original draft, Writing - review & editing.

584 Denise Martini: Conceptualization, Methodology, Writing - review & editing.

585 Liz Brown: Conceptualization, Resources, Writing - review & editing.

586 Richard F. Maloney: Conceptualization, Writing - review & editing.

587 Tammy E. Steeves: Conceptualization, Supervision, Writing - review & editing.

588 Michael Knapp: Conceptualization, Funding acquisition, Methodology, Project  
589 administration, Supervision, Writing - review & editing.

590

## 591 **13 References**

592

593 Alexander, D. H., Novembre, J., & Lange, K. (2009). Fast model-based estimation of  
594 ancestry in unrelated individuals. *Genome Research*, *19*(9), 1655–1664.

595 <https://doi.org/10.1101/gr.094052.109>

596 Allendorf, F. W., Hohenlohe, P. A., & Luikart, G. (2010). Genomics and the future of  
597 conservation genetics. *Nature Reviews Genetics*, *11*(10), 697–709.

598 <https://doi.org/10.1038/nrg2844>

599 Allendorf, F. W., Leary, R. F., Spruell, P., & Wenburg, J. K. (2001). The problems with  
600 hybrids: Setting conservation guidelines. *Trends in Ecology & Evolution*, *16*(11),

601 613–622. [https://doi.org/10.1016/S0169-5347\(01\)02290-X](https://doi.org/10.1016/S0169-5347(01)02290-X)

602 Altschul, S. F., Gish, W., Miller, W., Myers, E. W., & Lipman, D. J. (1990). Basic local  
603 alignment search tool. *Journal of Molecular Biology*, *215*(3), 403–410.

604 [https://doi.org/10.1016/S0022-2836\(05\)80360-2](https://doi.org/10.1016/S0022-2836(05)80360-2)

605 Andrews, K. R., Good, J. M., Miller, M. R., Luikart, G., & Hohenlohe, P. A. (2016).

606 Harnessing the power of RADseq for ecological and evolutionary genomics. *Nature*  
607 *Reviews Genetics*, *17*(2), 81–92. <https://doi.org/10.1038/nrg.2015.28>

608 Andrews, S. (2010). *FastQC: a quality control tool for high throughput sequence data*.

609 <http://www.bioinformatics.babraham.ac.uk/projects/fastqc>

- 610 Arnold, M. L. (1997). *Natural hybridization and species concepts*. Oxford University Press.  
611 <https://books.google.co.nz/books?hl=en&lr=&id=Jh8jVjEuDfUC&oi=fnd&pg=PR11>  
612 [&ots=PbObh3Qp32&sig=fligYJ6xTvI37WapjEhBmIzIPVs&redir\\_esc=y#v=onepage](https://books.google.co.nz/books?hl=en&lr=&id=Jh8jVjEuDfUC&oi=fnd&pg=PR11&ots=PbObh3Qp32&sig=fligYJ6xTvI37WapjEhBmIzIPVs&redir_esc=y#v=onepage)  
613 [&q&f=false](https://books.google.co.nz/books?hl=en&lr=&id=Jh8jVjEuDfUC&oi=fnd&pg=PR11&ots=PbObh3Qp32&sig=fligYJ6xTvI37WapjEhBmIzIPVs&redir_esc=y#v=onepage&q&f=false)
- 614 Avise, J. C. (2010). Perspective: Conservation genetics enters the genomics era.  
615 *Conservation Genetics*, 11(2), 665–669. <https://doi.org/10.1007/s10592-009-0006-y>
- 616 Ba, H., Jia, B., Wang, G., Yang, Y., Kedem, G., & Li, C. (2017). Genome-wide SNP  
617 discovery and analysis of genetic diversity in farmed sika deer (*Cervus nippon*) in  
618 northeast China using double-digest restriction site-associated DNA sequencing. *G3: Genes, Genomes, Genetics*, 7(9), 3169–3176. <https://doi.org/10.1534/g3.117.300082>
- 620 BirdLife International. (2018). *Himantopus novaezelandiae* (amended version of 2016  
621 assessment). *The IUCN Red List of Threatened Species*.  
622 <http://dx.doi.org/10.2305/IUCN.UK.2018-2.RLTS.T22693690A129560535.en>
- 623 Booth, J. E., Gaston, K. J., Evans, K. L., & Armsworth, P. R. (2011). The value of species  
624 rarity in biodiversity recreation: A birdwatching example. *Biological Conservation*,  
625 144(11), 2728–2732. <https://doi.org/10.1016/j.biocon.2011.02.018>
- 626 Brumfield, R. T. (2010). Speciation genetics of biological invasions with hybridization.  
627 *Molecular Ecology*, 19(23), 5079–5083. [https://doi.org/10.1111/j.1365-](https://doi.org/10.1111/j.1365-294X.2010.04896.x)  
628 [294X.2010.04896.x](https://doi.org/10.1111/j.1365-294X.2010.04896.x)
- 629 Catchen, J., Hohenlohe, P. A., Bassham, S., Amores, A., & Cresko, W. A. (2013). Stacks: An  
630 analysis tool set for population genomics. *Molecular Ecology*, 22(11), 3124–3140.  
631 <https://doi.org/10.1111/mec.12354>
- 632 Chan, C. H., Ballantyne, K. N., Aikman, H., Fastier, D., Daugherty, C. H., & Chambers, G.  
633 K. (2006). Genetic analysis of interspecific hybridisation in the world’s only Forbes’  
634 parakeet (*Cyanoramphus forbesi*) natural population. *Conservation Genetics*, 7(4),  
635 493–506. <https://doi.org/10.1007/s10592-005-9060-2>
- 636 Chen, N., Cosgrove, E. J., Bowman, R., Fitzpatrick, J. W., & Clark, A. G. (2016). Genomic  
637 consequences of population decline in the endangered Florida scrub-jay. *Current*  
638 *Biology*, 26(21), 2974–2979. <https://doi.org/10.1016/j.cub.2016.08.062>
- 639 Chunco, A. J. (2014). Hybridization in a warmer world. *Ecology and Evolution*, 4(10), 2019–  
640 2031. <https://doi.org/10.1002/ece3.1052>
- 641 Combosch, D. J., Lemer, S., Ward, P. D., Landman, N. H., & Giribet, G. (2017). Genomic  
642 signatures of evolution in Nautilus—An endangered living fossil. *Molecular Ecology*,  
643 26(21), 5923–5938. <https://doi.org/10.1111/mec.14344>

- 644 Conway, J. R., Lex, A., & Gehlenborg, N. (2017). UpSetR: An R package for the  
645 visualization of intersecting sets and their properties. *Bioinformatics*, 33(18), 2938–  
646 2940. <https://doi.org/10.1093/bioinformatics/btx364>
- 647 Courchamp, F., Angulo, E., Rivalan, P., Hall, R. J., Signoret, L., Bull, L., & Meinard, Y.  
648 (2006). Rarity value and species extinction: The anthropogenic Allee effect. *PLOS*  
649 *Biology*, 4(12), e415. <https://doi.org/10.1371/journal.pbio.0040415>
- 650 Cunha, R. L., Forsman, Z. H., Belderok, R., Knapp, I. S. S., Castilho, R., & Toonen, R. J.  
651 (2019). Rare coral under the genomic microscope: Timing and relationships among  
652 Hawaiian Montipora. *BMC Evolutionary Biology*, 19(1), 153.  
653 <https://doi.org/10.1186/s12862-019-1476-2>
- 654 Danecek, P., Auton, A., Abecasis, G., Albers, C. A., Banks, E., DePristo, M. A., Handsaker,  
655 R. E., Lunter, G., Marth, G. T., Sherry, S. T., McVean, G., & Durbin, R. (2011). The  
656 variant call format and VCFtools. *Bioinformatics*, 27(15), 2156–2158.  
657 <https://doi.org/10.1093/bioinformatics/btr330>
- 658 Davey, J. W., & Blaxter, M. L. (2010). RADSeq: Next-generation population genetics.  
659 *Briefings in Functional Genomics*, 9(5–6), 416–423.  
660 <https://doi.org/10.1093/bfpg/elq031>
- 661 Davey, J. W., Hohenlohe, P. A., Etter, P. D., Boone, J. Q., Catchen, J. M., & Blaxter, M. L.  
662 (2011). Genome-wide genetic marker discovery and genotyping using next-generation  
663 sequencing. *Nature Reviews Genetics*, 12(7), 499–510.  
664 <https://doi.org/10.1038/nrg3012>
- 665 Der Sarkissian, C., Ermini, L., Schubert, M., Yang, M. A., Librado, P., Fumagalli, M.,  
666 Jónsson, H., Bar-Gal, G. K., Albrechtsen, A., Vieira, F. G., Petersen, B., Ginolhac, A.,  
667 Seguin-Orlando, A., Magnussen, K., Fages, A., Gamba, C., Lorente-Galdos, B.,  
668 Polani, S., Steiner, C., ... Orlando, L. (2015). Evolutionary genomics and  
669 conservation of the endangered Przewalski's horse. *Current Biology*, 25(19), 2577–  
670 2583. <https://doi.org/10.1016/j.cub.2015.08.032>
- 671 Dufresnes, C., & Dubey, S. (2020). Invasion genomics supports an old hybrid swarm of pool  
672 frogs in Western Europe. *Biological Invasions*, 22(2), 205–210.  
673 <https://doi.org/10.1007/s10530-019-02112-8>
- 674 Edmands, S. (2007). Between a rock and a hard place: Evaluating the relative risks of  
675 inbreeding and outbreeding for conservation and management. *Molecular Ecology*,  
676 16(3), 463–475. <https://doi.org/10.1111/j.1365-294X.2006.03148.x>



- 677 Ekblom, R., & Galindo, J. (2011). Applications of next generation sequencing in molecular  
678 ecology of non-model organisms. *Heredity*, *107*(1), 1–15.  
679 <https://doi.org/10.1038/hdy.2010.152>
- 680 Elshire, R. J., Glaubitz, J. C., Sun, Q., Poland, J. A., Kawamoto, K., Buckler, E. S., &  
681 Mitchell, S. E. (2011). A robust, simple genotyping-by-sequencing (GBS) approach  
682 for high diversity species. *PLoS ONE*, *6*(5), e19379–e19379.  
683 <https://doi.org/10.1371/journal.pone.0019379>
- 684 Estévez, R. A., Anderson, C. B., Pizarro, J. C., & Burgman, M. A. (2015). Clarifying values,  
685 risk perceptions, and attitudes to resolve or avoid social conflicts in invasive species  
686 management. *Conservation Biology*, *29*(1), 19–30. <https://doi.org/10.1111/cobi.12359>
- 687 Fischer, M. C., Rellstab, C., Leuzinger, M., Roumet, M., Gugerli, F., Shimizu, K. K.,  
688 Holderegger, R., & Widmer, A. (2017). Estimating genomic diversity and population  
689 differentiation – an empirical comparison of microsatellite and SNP variation in  
690 *Arabidopsis halleri*. *BMC Genomics*, *18*(1), 69. [https://doi.org/10.1186/s12864-016-](https://doi.org/10.1186/s12864-016-3459-7)  
691 [3459-7](https://doi.org/10.1186/s12864-016-3459-7)
- 692 Fitzpatrick, B. M., Johnson, J. R., Kump, D. K., Smith, J. J., Voss, S. R., & Shaffer, H. B.  
693 (2010). Rapid spread of invasive genes into a threatened native species. *Proceedings*  
694 *of the National Academy of Sciences*, *107*(8), 3606–3610.  
695 <https://doi.org/10.1073/pnas.0911802107>
- 696 Francis, R. M. (2017). pophelter: An R package and web app to analyse and visualise  
697 population structure. *Molecular Ecology Resources*, *17*(1), 27–32.  
698 <https://doi.org/10.1111/1755-0998.12509>
- 699 Galla, S. J., Buckley, T. R., Elshire, R., Hale, M. L., Knapp, M., Mccallum, J., Moraga, R.,  
700 Santure, A. W., Wilcox, P., & Steeves, T. E. (2016). Building strong relationships  
701 between conservation genetics and primary industry leads to mutually beneficial  
702 genomic advances. *Molecular Ecology*. <https://doi.org/10.1111/mec.13837>
- 703 Galla, S. J., Forsdick, N. J., Brown, L., Hoepfner, M., Knapp, M., Maloney, R. F., Moraga,  
704 R., Santure, A. W., & Steeves, T. E. (2019). Reference genomes from distantly related  
705 species can be used for discovery of single nucleotide polymorphisms to inform  
706 conservation management. *Genes*, *10*(1), 9. <https://doi.org/10.3390/genes10010009>
- 707 Galla, S. J., Moraga, R., Brown, L., Cleland, S., Hoepfner, M. P., Maloney, R. F.,  
708 Richardson, A., Slater, L., Santure, A. W., & Steeves, T. E. (2020). A comparison of  
709 pedigree, genetic and genomic estimates of relatedness for informing pairing  
710 decisions in two critically endangered birds: Implications for conservation breeding

- 711 programmes worldwide. *Evolutionary Applications*.  
712 <https://doi.org/10.1111/eva.12916>
- 713 Glaubitz, J. C., Casstevens, T. M., Lu, F., Harriman, J., Elshire, R. J., Sun, Q., & Buckler, E.  
714 S. (2014). TASSEL-GBS: a high capacity genotyping by sequencing analysis  
715 pipeline. *PLoS ONE*, 9(2), e90346–e90346.  
716 <https://doi.org/10.1371/journal.pone.0090346>
- 717 Gompert, Z. (2012). Population genomics as a new tool for wildlife management. *Molecular*  
718 *Ecology*, 21(7), 1542–1544. <https://doi.org/10.1111/j.1365-294X.2012.05471.x>
- 719 Hagen, E. N., Hale, M. L., Maloney, R. F., & Steeves, T. E. (2011). Conservation genetic  
720 management of a critically endangered New Zealand endemic bird: Minimizing  
721 inbreeding in the Black Stilt *Himantopus novaezelandiae*. *Ibis*, 153(3), 556–561.  
722 <https://doi.org/10.1111/j.1474-919X.2011.01137.x>
- 723 Haig, S. M., & Allendorf, F. W. (2006). Hybrids and policy. In J. M. Scott, D. D. Goble, & F.  
724 W. Davis (Eds.), *The Endangered Species Act at Thirty, Volume 2: Conserving*  
725 *Biodiversity in Human-Dominated Landscapes* (pp. 150–163). Island Press.  
726 <https://digitalcommons.unl.edu/usgsstaffpub/708/>
- 727 Hamilton, J. A., & Miller, J. M. (2016). Adaptive introgression as a resource for management  
728 and genetic conservation in a changing climate. *Conservation Biology*, 30(1), 33–41.  
729 <https://doi.org/10.1111/cobi.12574>
- 730 Hanna, Z. R., Dumbacher, J. P., Bowie, R. C. K., Henderson, J. B., & Wall, J. D. (2018).  
731 Whole-genome analysis of introgression between the Spotted Owl and Barred Owl  
732 (*Strix occidentalis* and *Strix varia*, respectively; Aves: Strigidae) in Western North  
733 America. *G3: Genes, Genomes, Genetics*, 8(12), 3945–3952.  
734 <https://doi.org/10.1534/g3.118.200754>
- 735 Hauser, L., Baird, M., Hilborn, R., Seeb, L. W., & Seeb, J. E. (2011). An empirical  
736 comparison of SNPs and microsatellites for parentage and kinship assignment in a  
737 wild sockeye salmon (*Oncorhynchus nerka*) population. *Molecular Ecology*  
738 *Resources*, 11(SUPPL. 1), 150–161. [https://doi.org/10.1111/j.1755-](https://doi.org/10.1111/j.1755-0998.2010.02961.x)  
739 [0998.2010.02961.x](https://doi.org/10.1111/j.1755-0998.2010.02961.x)
- 740 Heezik, Y. van, Lei, P., Maloney, R. F., & Sancha, E. (2005). Captive breeding for  
741 reintroduction: Influence of management practices and biological factors on survival  
742 of captive kaki (black stilt). *Zoo Biology*, 24(5), 459–474.  
743 <https://doi.org/10.1002/zoo.20065>

- 744 Hohenlohe, P. A., Day, M. D., Amish, S. J., Miller, M. R., Kamps-Hughes, N., Boyer, M. C.,  
745 Muhlfeld, C. C., Allendorf, F. W., Johnson, E. A., & Luikart, G. (2013). Genomic  
746 patterns of introgression in rainbow and westslope cutthroat trout illuminated by  
747 overlapping paired-end RAD sequencing. *Molecular Ecology*, 22(11), 3002–3013.  
748 <https://doi.org/10.1111/mec.12239>
- 749 Hohenlohe, P. A., Rutledge, L. Y., Waits, L. P., Andrews, K. R., Adams, J. R., Hinton, J. W.,  
750 Nowak, R. M., Patterson, B. R., Wydeven, A. P., Wilson, P. A., & White, B. N.  
751 (2017). Comment on “Whole-genome sequence analysis shows two endemic species  
752 of North American wolf are admixtures of the coyote and gray wolf.” *Science*  
753 *Advances*, 3(6), e1602250–e1602250. <https://doi.org/10.1126/sciadv.1602250>
- 754 Jackiw, R. N., Mandil, G., & Hager, H. A. (2015). A framework to guide the conservation of  
755 species hybrids based on ethical and ecological considerations. *Conservation Biology*,  
756 29(4), 1040–1051. <https://doi.org/10.1111/cobi.12526>
- 757 Jakobsson, M., & Rosenberg, N. A. (2007). CLUMPP: A cluster matching and permutation  
758 program for dealing with label switching and multimodality in analysis of population  
759 structure. *Bioinformatics*, 23(14), 1801–1806.  
760 <https://doi.org/10.1093/bioinformatics/btm233>
- 761 Jombart, T. (2008). adegenet: A R package for the multivariate analysis of genetic markers.  
762 *Bioinformatics*, 24(11), 1403–1405. <https://doi.org/10.1093/bioinformatics/btn129>
- 763 Jombart, T., & Ahmed, I. (2011). adegenet 1.3-1: New tools for the analysis of genome-wide  
764 SNP data. *Bioinformatics*, 27(21), 3070–3071.  
765 <https://doi.org/10.1093/bioinformatics/btr521>
- 766 Jombart, T., & Collins, C. (2015a). *A tutorial for Discriminant Analysis of Principal*  
767 *Components (DAPC) using adegenet 2.0.0*. [http://adegenet.r-forge.r-](http://adegenet.r-forge.r-project.org/files/tutorial-dapc.pdf)  
768 [project.org/files/tutorial-dapc.pdf](http://adegenet.r-forge.r-project.org/files/tutorial-dapc.pdf)
- 769 Jombart, T., & Collins, C. (2015b). *Analysing genome-wide SNP data using adegenet 2.0.0*.  
770 <http://adegenet.r-forge.r-project.org/files/tutorial-genomics.pdf>
- 771 Jombart, T., Devillard, S., & Balloux, F. (2010). Discriminant analysis of principal  
772 components: A new method for the analysis of genetically structured populations.  
773 *BMC Genetics*, 11(1), 94–94. <https://doi.org/10.1186/1471-2156-11-94>
- 774 Joshi, N. (2013). *Sabre—A barcode demultiplexing and trimming tool for FastQ files*.  
775 <https://github.com/najoshi/sabre>

- 776 Keedwell, R. J., Maloney, R. F., & Murray, D. P. (2002). Predator control for protecting kaki  
777 (*Himantopus novaezelandiae*)—Lessons from 20 years of management. *Biological*  
778 *Conservation*, 105(3), 369–374. [https://doi.org/10.1016/S0006-3207\(01\)00220-8](https://doi.org/10.1016/S0006-3207(01)00220-8)
- 779 Leigh, D. M., Lischer, H. E. L., Grossen, C., & Keller, L. F. (2018). Batch effects in a  
780 multiyear sequencing study: False biological trends due to changes in read lengths.  
781 *Molecular Ecology Resources*, 18(4), 778–788. [https://doi.org/10.1111/1755-](https://doi.org/10.1111/1755-0998.12779)  
782 0998.12779
- 783 Lex, A., Gehlenborg, N., Strobel, H., Vuilleumot, R., & Pfister, H. (2014). UpSet:  
784 Visualization of intersecting sets. *IEEE Transactions on Visualization and Computer*  
785 *Graphics*, 20(12), 1983–1992. <https://doi.org/10.1109/TVCG.2014.2346248>
- 786 Li, H. (2011). A statistical framework for SNP calling, mutation discovery, association  
787 mapping and population genetical parameter estimation from sequencing data.  
788 *Bioinformatics*, 27(21), 2987–2993. <https://doi.org/10.1093/bioinformatics/btr509>
- 789 Li, H., & Durbin, R. (2009). Fast and accurate short read alignment with Burrows-Wheeler  
790 transform. *Bioinformatics*, 25(14), 1754–1760.  
791 <https://doi.org/10.1093/bioinformatics/btp324>
- 792 Li, R., Fan, W., Tian, G., Zhu, H., He, L., Cai, J., Huang, Q., Cai, Q., Li, B., Bai, Y., Zhang,  
793 Z., Zhang, Y., Wang, W., Li, J., Wei, F., Li, H., Jian, M., Li, J., Zhang, Z., ... Wang,  
794 J. (2010). The sequence and de novo assembly of the giant panda genome. *Nature*,  
795 463(7279), 311–317. <https://doi.org/10.1038/nature08696>
- 796 Lynch, M. (1991). The genetic interpretation of inbreeding depression and outbreeding  
797 depression. *Evolution; International Journal of Organic Evolution*, 45(3), 622–629.  
798 <https://doi.org/10.1111/j.1558-5646.1991.tb04333.x>
- 799 Ma, W., & Lambert, D. (1997). Minisatellite DNA markers reveal hybridisation between the  
800 endangered black robin and tomtit. *ELECTROPHORESIS*, 18(9), 1682–1687.  
801 <https://doi.org/10.1002/elps.1150180936>
- 802 Maguire, L. A., & Justus, J. (2008). Why Intrinsic Value Is a Poor Basis for Conservation  
803 Decisions. *BioScience*, 58(10), 910–911. <https://doi.org/10.1641/B581002>
- 804 Maloney, R. F., & Murray, D. P. (2001). *Kaki (black stilt) Recovery Plan 2001-2011*.  
805 Department of Conservation, Wellington, New Zealand.
- 806 Martin, M. (2011). Cutadapt removes adapter sequences from high-throughput sequencing  
807 reads. *EMBnet.Journal*, 17, 10–12. <http://dx.doi.org/10.14806/ej.17.1.200>
- 808 Martin, C. H., Crawford, J. E., Turner, B. J., & Simons, L. H. (2016). Diabolical survival in  
809 Death Valley: Recent pupfish colonization, gene flow and genetic assimilation in the

- 810 smallest species range on earth. *Proceedings of the Royal Society B: Biological*  
811 *Sciences*, 283(1823), 20152334. <https://doi.org/10.1098/rspb.2015.2334>
- 812 McCartney-Melstad, E., Vu, J. K., & Shaffer, H. B. (2018). Genomic data recover previously  
813 undetectable fragmentation effects in an endangered amphibian. *Molecular Ecology*,  
814 27(22), 4430–4443. <https://doi.org/10.1111/mec.14892>
- 815 McFarlane, S. E., Hunter, D. C., Senn, H. V., Smith, S. L., Holland, R., Huisman, J., &  
816 Pemberton, J. M. (2020). Increased genetic marker density reveals high levels of  
817 admixture between red deer and introduced Japanese sika in Kintyre, Scotland.  
818 *Evolutionary Applications*, 13(2), 432–441. <https://doi.org/10.1111/eva.12880>
- 819 McKenna, A., Hanna, M., Banks, E., Sivachenko, A., Cibulskis, K., Kernytsky, A.,  
820 Garimella, K., Altshuler, D., Gabriel, S., Daly, M., & DePristo, M. A. (2010). The  
821 Genome Analysis Toolkit: A MapReduce framework for analyzing next-generation  
822 DNA sequencing data. *Genome Research*, 20(9), 1297–1303.  
823 <https://doi.org/10.1101/gr.107524.110>
- 824 Milián-García, Y., Ramos-Targarona, R., Pérez-Fleitas, E., Sosa-Rodríguez, G., Guerra-  
825 Manchena, L., Alonso-Tabet, M., Espinosa-López, G., & Russello, M. A. (2015).  
826 Genetic evidence of hybridization between the critically endangered Cuban crocodile  
827 and the American crocodile: Implications for population history and in situ/ex situ  
828 conservation. *Heredity*, 114(3), 272–280. <https://doi.org/10.1038/hdy.2014.96>
- 829 Narum, S. R., Buerkle, C. A., Davey, J. W., Miller, M. R., & Hohenlohe, P. A. (2013).  
830 Genotyping-by-sequencing in ecological and conservation genomics. *Molecular*  
831 *Ecology*, 22(11), 2841–2847. <https://doi.org/10.1111/mec.12350>
- 832 Overbeek, A. L., Galla, S. J., Cleland, S., Thyne, C., Maloney, R. F., & Steeves, T. E. (In  
833 Press). *Pedigree validation using genetic markers in an intensively-managed taonga*  
834 *species, the critically endangered kakī (Himantopus novaezelandiae)*.
- 835 Overbeek, A. L., Hauber, M. E., Brown, E., Cleland, S., Maloney, R. F., & Steeves, T. E.  
836 (2017). Evidence for brood parasitism in a critically endangered Charadriiform with  
837 implications for conservation. *Journal of Ornithology*, 158(1), 333–337.  
838 <https://doi.org/10.1007/s10336-016-1375-x>
- 839 Parejo, M., Henriques, D., Pinto, M. A., Soland-Reckeweg, G., & Neuditschko, M. (2018).  
840 Empirical comparison of microsatellite and SNP markers to estimate introgression in  
841 *Apis mellifera mellifera*. *Journal of Apicultural Research*, 57(4), 504–506.  
842 <https://doi.org/10.1080/00218839.2018.1494894>



- 843 Peek, R. A., Bedwell, M., O'Rourke, S. M., Goldberg, C., Wengert, G. M., & Miller, M. R.  
844 (2019). Hybridization between two parapatric ranid frog species in the northern Sierra  
845 Nevada, California, USA. *Molecular Ecology*, 28(20), 4636–4647.  
846 <https://doi.org/10.1111/mec.15236>
- 847 Peters, J. L., Lavretsky, P., DaCosta, J. M., Bielefeld, R. R., Feddersen, J. C., & Sorenson, M.  
848 D. (2016). Population genomic data delineate conservation units in mottled ducks  
849 (*Anas fulvigula*). *Biological Conservation*, 203, 272–281.  
850 <https://doi.org/10.1016/j.biocon.2016.10.003>
- 851 Peterson, B. K., Weber, J. N., Kay, E. H., Fisher, H. S., & Hoekstra, H. E. (2012). Double  
852 digest RADseq: An inexpensive method for de novo SNP discovery and genotyping  
853 in model and non-model species. *PLoS ONE*, 7(5), e37135–e37135.  
854 <https://doi.org/10.1371/journal.pone.0037135>
- 855 Picard Toolkit. (2019). *Picard Toolkit*. Broad Institute. <http://broadinstitute.github.io/picard/>
- 856 Pierce, R. J. (1984a). Plumage, morphology and hybridisation of New Zealand stilts  
857 *Himantopus* spp. *Notornis*, 31(2), 106–130.
- 858 Pierce, R. J. (1984b). The changed distribution of stilts in New Zealand. *Notornis*, 31(1), 7–  
859 18.
- 860 Pierpaoli, M., Birò, Z. S., Herrmann, M., Hupe, K., Fernandes, M., Ragni, B., Szemethy, L.,  
861 & Randi, E. (2003). Genetic distinction of wildcat (*Felis silvestris*) populations in  
862 Europe, and hybridization with domestic cats in Hungary. *Molecular Ecology*, 12(10),  
863 2585–2598. <https://doi.org/10.1046/j.1365-294x.2003.01939.x>
- 864 Primmer, C. R. (2009). From conservation genetics to conservation genomics. *Annals of the*  
865 *New York Academy of Sciences*, 1162, 357–368. <https://doi.org/10.1111/j.1749-6632.2009.04444.x>
- 867 Quilodrán, C. S., Currat, M., & Montoya-Burgos, J. I. (2018). Effect of hybridization with  
868 genome exclusion on extinction risk. *Conservation Biology*, 32(5), 1139–1149.  
869 <https://doi.org/10.1111/cobi.13120>
- 870 R Core Team. (2018). *R: A language and environment for statistical computing*.  
871 <https://www.R-project.org/>
- 872 Reed, C. E. M., Butler, D., & Murray, D. P. (1993). *Black Stilt Recovery Plan (Himantopus*  
873 *novaezealandiae)*. Department of Conservation, Wellington, New Zealand.
- 874 Rexer-Huber, K., Veale, A. J., Catry, P., Cherel, Y., Dutoit, L., Foster, Y., McEwan, J. C.,  
875 Parker, G. C., Phillips, R. A., Ryan, P. G., Stanworth, A. J., Stijn, T. van, Thompson,  
876 D. R., Waters, J., & Robertson, B. C. (2019). Genomics detects population structure



- 877 within and between ocean basins in a circumpolar seabird: The white-chinned petrel.  
878 *Molecular Ecology*, 28(20), 4552–4572. <https://doi.org/10.1111/mec.15248>
- 879 Rhymer, J. M., & Simberloff, D. (1996). Extinction by hybridization and introgression.  
880 *Annual Review of Ecology and Systematics*, 27(1), 83–109.  
881 <https://doi.org/10.1146/annurev.ecolsys.27.1.83>
- 882 Richardson, L., & Loomis, J. (2009). The total economic value of threatened, endangered and  
883 rare species: An updated meta-analysis. *Ecological Economics*, 68(5), 1535–1548.  
884 <https://doi.org/10.1016/j.ecolecon.2008.10.016>
- 885 Rick, K., Ottewell, K., Lohr, C., Thavornkanlapachai, R., Byrne, M., & Kennington, W. J.  
886 (2019). Population genomics of *Bettongia lesueur*: Admixing increases genetic  
887 diversity with no evidence of outbreeding depression. *Genes*, 10(11), 851.  
888 <https://doi.org/10.3390/genes10110851>
- 889 Riley, S. P. D., Bradley Shaffer, H., Randal Voss, S., & Fitzpatrick, B. M. (2003).  
890 Hybridization between a rare, native tiger salamander (*Ambystoma californiense*) and  
891 its introduced congener. *Ecological Applications*, 13(5), 1263–1275.  
892 <https://doi.org/10.1890/02-5023>
- 893 Rimmer, A., Phan, H., Mathieson, I., Iqbal, Z., Twigg, S. R. F., Wilkie, A. O. M., McVean,  
894 G., & Lunter, G. (2014). Integrating mapping-, assembly- and haplotype-based  
895 approaches for calling variants in clinical sequencing applications. *Nature Genetics*,  
896 46(8), 912–918. <https://doi.org/10.1038/ng.3036>
- 897 Robertson, H. A., Baird, K., Dowding, J. E., Elliott, G. P., Hitchmough, R. A., Miskelly, C.  
898 M., McArthur, N., O'Donnell, C. F. J., Sagar, P. M., Scofield, R. P., & Taylor, G. A.  
899 (2016). *Conservation status of New Zealand birds, 2016* (p. 27). Department of  
900 Conservation, Wellington, New Zealand.
- 901 Rutledge, L. Y., Devillard, S., Boone, J. Q., Hohenlohe, P. A., & White, B. N. (2015). RAD  
902 sequencing and genomic simulations resolve hybrid origins within North American  
903 *Canis*. *Biology Letters*, 11(7), 20150303. <https://doi.org/10.1098/rsbl.2015.0303>
- 904 Santure, A. W., Stapley, J., Ball, A. D., Birkhead, T. R., Burke, T., & Slate, J. (2010). On the  
905 use of large marker panels to estimate inbreeding and relatedness: Empirical and  
906 simulation studies of a pedigreed zebra finch population typed at 771 SNPs.  
907 *Molecular Ecology*, 19(7), 1439–1451. [https://doi.org/10.1111/j.1365-](https://doi.org/10.1111/j.1365-294X.2010.04554.x)  
908 [294X.2010.04554.x](https://doi.org/10.1111/j.1365-294X.2010.04554.x)

- 909 Schlaepfer, M. A., Sax, D. F., & Olden, J. D. (2011). The potential conservation value of  
910 non-native species. *Conservation Biology*, *25*(3), 428–437.  
911 <https://doi.org/10.1111/j.1523-1739.2010.01646.x>
- 912 Seabury, C. M., Bhattarai, E. K., Taylor, J. F., Viswanathan, G. G., Cooper, S. M., Davis, D.  
913 S., Dowd, S. E., Lockwood, M. L., & Seabury, P. M. (2011). Genome-wide  
914 polymorphism and comparative analyses in the white-tailed deer (*Odocoileus*  
915 *virginianus*): A model for conservation genomics. *PloS One*, *6*(1), e15811.  
916 <https://doi.org/10.1371/journal.pone.0015811>
- 917 Sovic, M. G., Fries, A. C., & Gibbs, H. L. (2016). Origin of a cryptic lineage in a threatened  
918 reptile through isolation and historical hybridization. *Heredity*, *117*(5), 358–366.  
919 <https://doi.org/10.1038/hdy.2016.56>
- 920 Steeves, T. E., Maloney, R. F., Hale, M. L., Tylianakis, J. M., & Gemmell, N. J. (2010).  
921 Genetic analyses reveal hybridization but no hybrid swarm in one of the world’s  
922 rarest birds. *Molecular Ecology*, *19*, 5090–5100. [https://doi.org/10.1111/j.1365-](https://doi.org/10.1111/j.1365-294X.2010.04895.x)  
923 [294X.2010.04895.x](https://doi.org/10.1111/j.1365-294X.2010.04895.x)
- 924 Sutton, J. T., Helmkampf, M., Steiner, C. C., Bellinger, M. R., Korlach, J., Hall, R.,  
925 Baybayan, P., Muehling, J., Gu, J., Kingan, S., Masuda, B. M., & Ryder, O. A.  
926 (2018). A high-quality, long-read de novo genome assembly to aid conservation of  
927 Hawaii’s last remaining crow species. *Genes*, *9*(8), 393.  
928 <https://doi.org/10.3390/genes9080393>
- 929 Taylor, E. B., Boughman, J. W., Groenenboom, M., Sniatynski, M., Schluter, D., & Gow, J.  
930 L. (2006). Speciation in reverse: Morphological and genetic evidence of the collapse  
931 of a three-spined stickleback (*Gasterosteus aculeatus*) species pair. *Molecular*  
932 *Ecology*, *15*(2), 343–355. <https://doi.org/10.1111/j.1365-294X.2005.02794.x>
- 933 Taylor, H. R. (2015). The use and abuse of genetic marker-based estimates of relatedness and  
934 inbreeding. *Ecology and Evolution*, *5*(15), 3140–3150.  
935 <https://doi.org/10.1002/ece3.1541>
- 936 Taylor, H. R., Kardos, M. D., Ramstad, K. M., & Allendorf, F. W. (2015). Valid estimates of  
937 individual inbreeding coefficients from marker-based pedigrees are not feasible in  
938 wild populations with low allelic diversity. *Conservation Genetics*, *16*(4), 901–913.  
939 <https://doi.org/10.1007/s10592-015-0709-1>
- 940 Todesco, M., Pascual, M. A., Owens, G. L., Ostevik, K. L., Moyers, B. T., Hübner, S.,  
941 Heredia, S. M., Hahn, M. A., Caseys, C., Bock, D. G., & Rieseberg, L. H. (2016).

- 942 Hybridization and extinction. *Evolutionary Applications*, 9(7), 892–908.  
943 <https://doi.org/10.1111/eva.12367>
- 944 Toews, D. P. L., Taylor, S. A., Vallender, R., Brelsford, A., Butcher, B. G., Messer, P. W., &  
945 Lovette, I. J. (2016). Plumage genes and little else distinguish the genomes of  
946 hybridizing warblers. *Current Biology*, 26(17), 2313–2318.  
947 <https://doi.org/10.1016/J.CUB.2016.06.034>
- 948 Tokarska, M., Marshall, T., Kowalczyk, R., Wójcik, J. M., Pertoldi, C., Kristensen, T. N.,  
949 Loeschcke, V., Gregersen, V. R., & Bendixen, C. (2009). Effectiveness of  
950 microsatellite and SNP markers for parentage and identity analysis in species with  
951 low genetic diversity: The case of European bison. *Heredity*, 103(4), 326–332.  
952 <https://doi.org/10.1038/hdy.2009.73>
- 953 Väli, Ü., Einarsson, A., Waits, L., & Ellegren, H. (2008). To what extent do microsatellite  
954 markers reflect genome-wide genetic diversity in natural populations? *Molecular*  
955 *Ecology*, 17(17), 3808–3817. <https://doi.org/10.1111/j.1365-294X.2008.03876.x>
- 956 vonHoldt, B. M., Brzeski, K. E., Wilcove, D. S., & Rutledge, L. Y. (2018). Redefining the  
957 role of admixture and genomics in species conservation. *Conservation Letters*, 11(2),  
958 e12371. <https://doi.org/10.1111/conl.12371>
- 959 vonHoldt, B. M., Cahill, J. A., Fan, Z., Gronau, I., Robinson, J., Pollinger, J. P., Shapiro, B.,  
960 Wall, J., & Wayne, R. K. (2016). Whole-genome sequence analysis shows that two  
961 endemic species of North American wolf are admixtures of the coyote and gray wolf.  
962 *Science Advances*, 2(7), e1501714–e1501714. <https://doi.org/10.1126/sciadv.1501714>
- 963 vonHoldt, B. M., Pollinger, J. P., Earl, D. A., Knowles, J. C., Boyko, A. R., Parker, H.,  
964 Geffen, E., Pilot, M., Jedrzejewski, W., Jedrzejewska, B., Sidorovich, V., Greco, C.,  
965 Randi, E., Musiani, M., Kays, R., Bustamante, C. D., Ostrander, E. A., Novembre, J.,  
966 & Wayne, R. K. (2011). A genome-wide perspective on the evolutionary history of  
967 enigmatic wolf-like canids. *Genome Research*, 21(8), 1294–1305.  
968 <https://doi.org/10.1101/gr.116301.110>
- 969 Wayne, R. K., & Shaffer, H. B. (2016). Hybridization and endangered species protection in  
970 the molecular era. *Molecular Ecology*, 25(11), 2680–2689.  
971 <https://doi.org/10.1111/mec.13642>
- 972 Weinman, L. R., Solomon, J. W., & Rubenstein, D. R. (2015). A comparison of single  
973 nucleotide polymorphism and microsatellite markers for analysis of parentage and  
974 kinship in a cooperatively breeding bird. *Molecular Ecology Resources*, 15(3), 502–  
975 511. <https://doi.org/10.1111/1755-0998.12330>

- 976 Wells, C. P., Lavretsky, P., Sorenson, M. D., Peters, J. L., DaCosta, J. M., Turnbull, S.,  
977 Uyehara, K. J., Malachowski, C. P., Dugger, B. D., Eadie, J. M., & Engilis, A. (2019).  
978 Persistence of an endangered native duck, feral mallards, and multiple hybrid swarms  
979 across the main Hawaiian Islands. *Molecular Ecology*, 28(24), 5203–5216.  
980 <https://doi.org/10.1111/mec.15286>
- 981 Wolf, D. E., Takebayashi, N., & Rieseberg, L. H. (2001). Predicting the risk of extinction  
982 through hybridization. *Conservation Biology*, 15(4), 1039–1053.  
983 <https://doi.org/10.1046/j.1523-1739.2001.0150041039.x>
- 984 Wright, B. R., Grueber, C. E., Lott, M. J., Belov, K., Johnson, R. N., & Hogg, C. J. (2019).  
985 Impact of reduced-representation sequencing protocols on detecting population  
986 structure in a threatened marsupial. *Molecular Biology Reports*, 1–6.  
987 <https://doi.org/10.1007/s11033-019-04966-6>

## 14 Figures and Tables

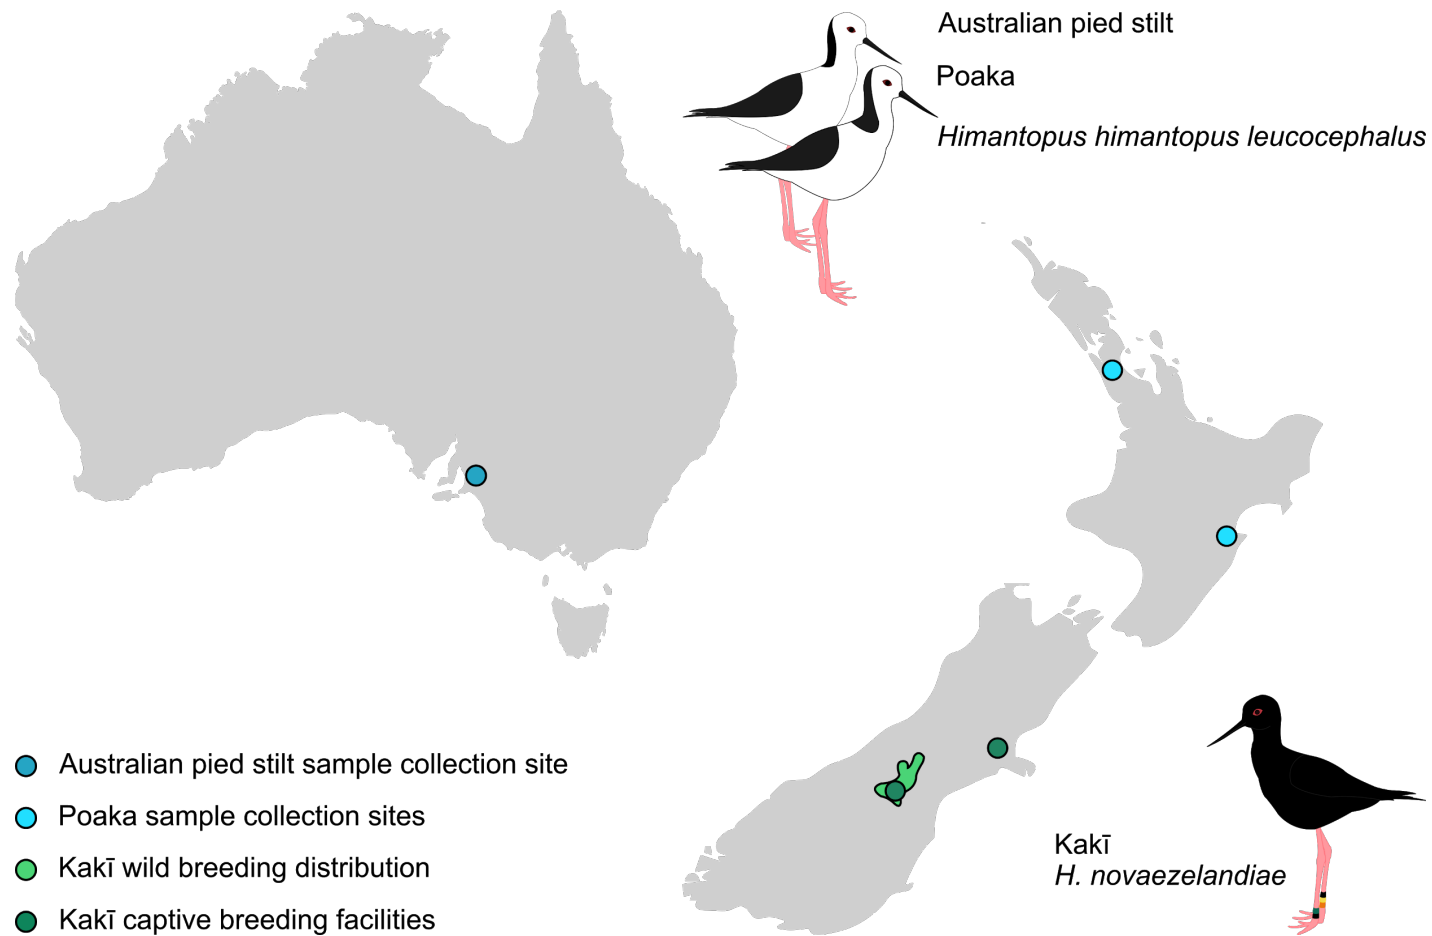

**Figure 1** Locations of kakī captive breeding facilities and wild breeding distribution, and Australian pied stilt and poaka sampling sites in Australia and Aotearoa New Zealand (maps not to scale).

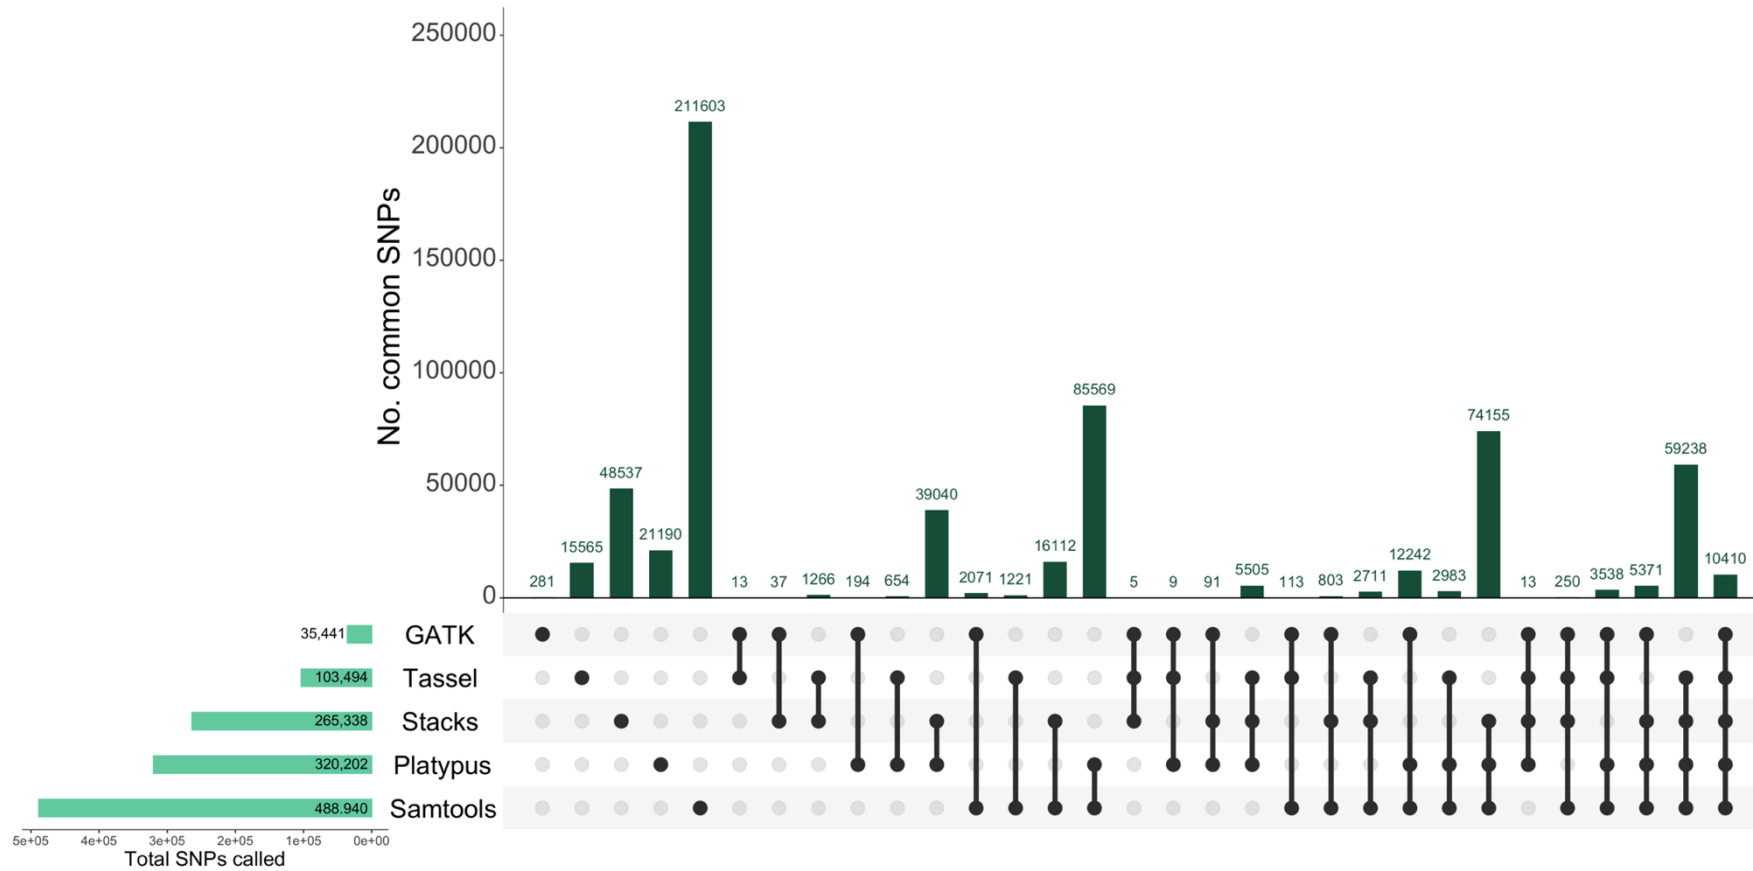

**Figure 2** UpSetR plot of the intersections of the total variants discovered from GBS data for kakī, Australian pied stilts and poaka, and interspecific hybrids across five variant discovery pipelines: GATK, Platypus, Samtools, Stacks, and Tassel. Bottom left bars represent the total number of variants discovered with each pipeline, while the main bar plot represents the number of variants common to multiple pipelines as indicated by the filled circles below.



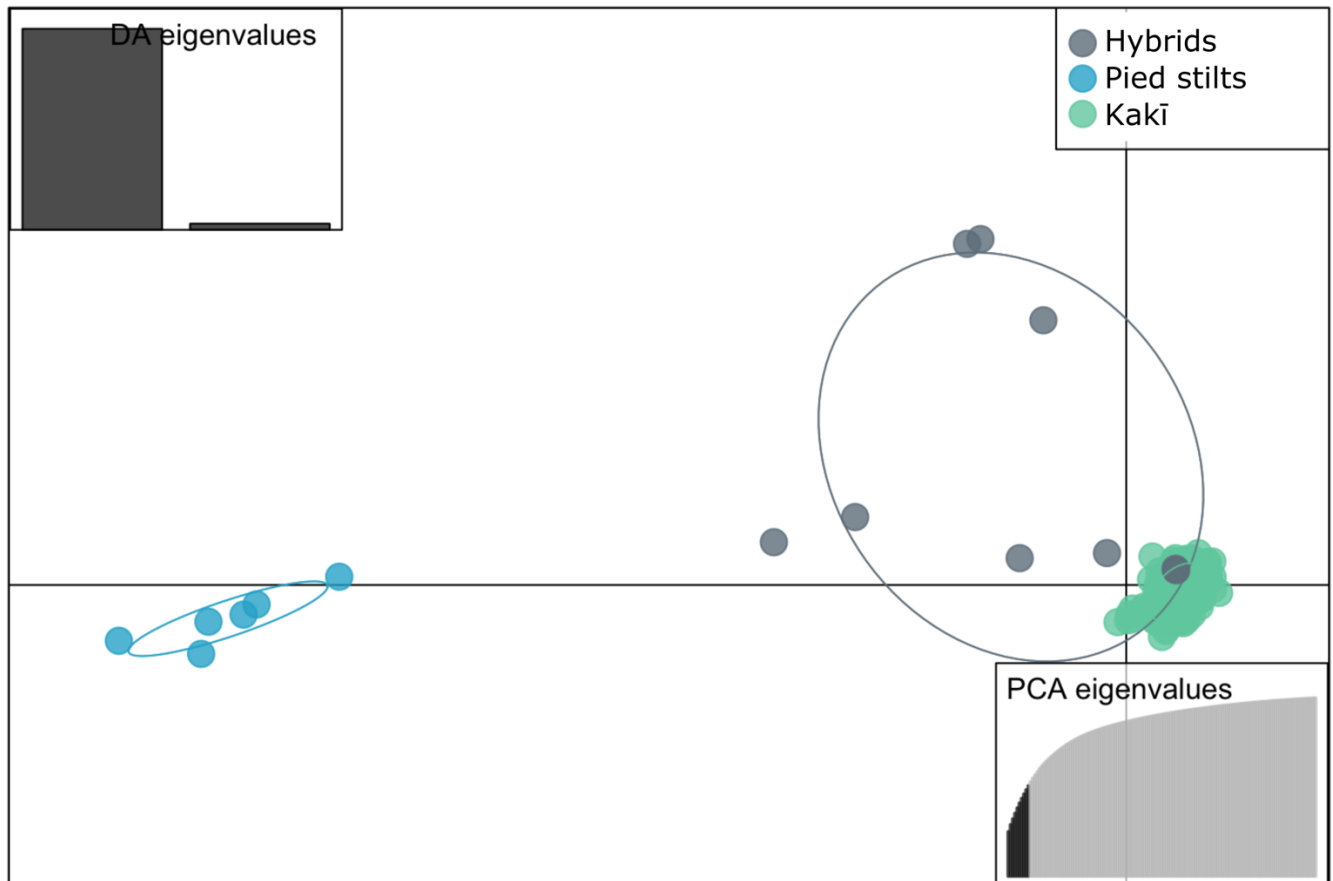

**Figure 3** Scatterplot of a Discriminant Analysis of Principal Components (DAPC) produced from GBS data for kakī, Australian pied stilts and poaka, and interspecific hybrids conducted in adegenet. Individuals are coloured according to predefined population information as one of: kakī (*Himantopus novaeseelandiae*), Australian pied stilts/poaka (*H. himantopus leucocephalus*), or interspecific hybrids. The closer individuals are to one another in the plot, the more likely they are to have shared genetic ancestry. DAPC analysis was optimised using  $a$ -score, cross-validation, and BIC to derive the appropriate number of principal components (2 discriminants, 10 PCs). The 67% inertial ellipses around each cluster represent the variance of the clusters depicted. The insert of PCA eigenvalues represents the variation explained by the PCs, and the insert of DA eigenvalues represents the magnitude of variation explained by the two discriminants.

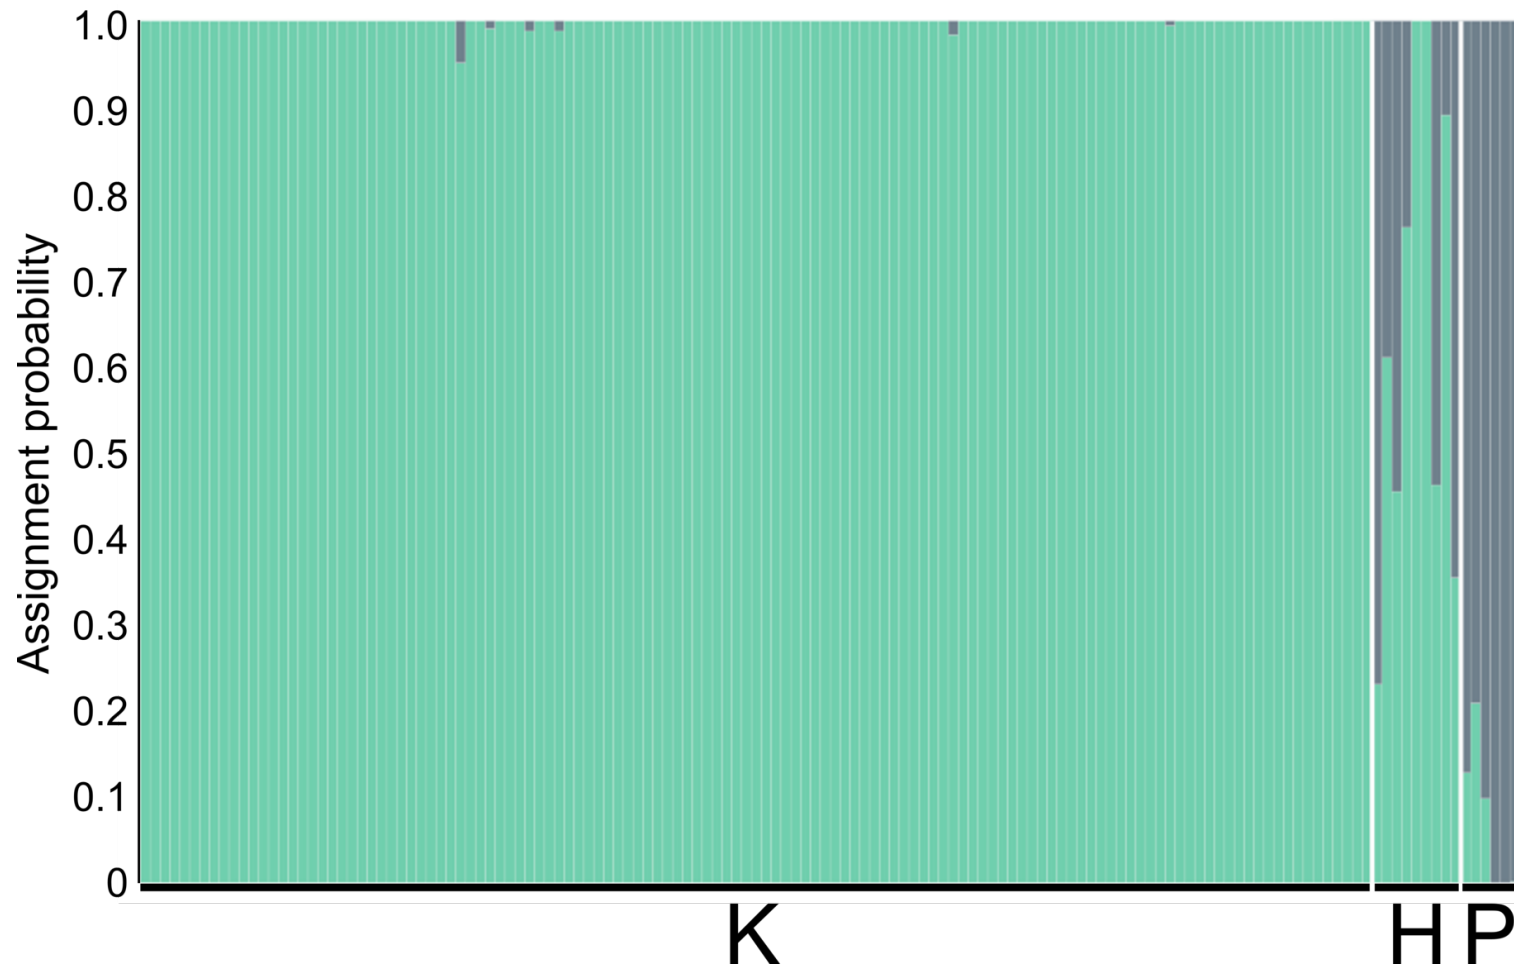

**Figure 4** Assignment probabilities for kakī (K), Australian pied stilts and poaka (P), and interspecific hybrids (H) produced via pophelper visualisation of CLUMPP-permuted ADMIXTURE results when  $K = 2$ . Each individual is represented by a vertical bar, with colours indicating the assignment probability to the kakī (green) or Australian pied stilts/poaka (grey) cluster.

**Table 1** Interspecific hybridisation research of conservation relevance where both genetic and genomic data have been generated and both have been used to assess hybrids or hybridisation. 'Conservation relevance' is used to mean that the hybridisation involves a threatened species, and the outcomes of the study have implications for conservation and/or present recommendations for conservation management. Web of Science search (19 July 2020): ALL FIELDS: (((genetic AND genomic) AND (hybridization OR introgression OR admixture) AND (conservation OR threatened OR endangered)) AND (fish OR bird OR mammal OR marsupial OR amphibian OR reptile OR plant OR invertebrate OR insect OR mollusc OR crustacean)). Of the 237 results, to capture empirical research that used high-throughput genomic sequencing techniques only, reviews and editorials, and articles published prior to 2014 were excluded. From the remaining 119 results, studies assessing intraspecific admixture or with no clear conservation relevance were excluded.

| Taxa                                                                                                                 | Hybridisation relevance                                                                          | Genetic data                                                             | Genomic data                        | Genetic and genomic data comparison                                                                                                                                                                       | Conservation implications                                                                                                    |
|----------------------------------------------------------------------------------------------------------------------|--------------------------------------------------------------------------------------------------|--------------------------------------------------------------------------|-------------------------------------|-----------------------------------------------------------------------------------------------------------------------------------------------------------------------------------------------------------|------------------------------------------------------------------------------------------------------------------------------|
| Mottled duck ( <i>Anas fulvigula</i> ) and mallard ( <i>A. platyrhynchos</i> ) <sup>1</sup>                          | Species known to hybridise with subsequent backcrossing.                                         | Microsatellite markers, introns, allozymes                               | ddRADseq                            | Genomic data provides more robust evidence of admixture with mallards.                                                                                                                                    | Hybridisation creates potential for replacement of mottled ducks by mallards.                                                |
| Golden-winged warbler ( <i>Vermivora chrysoptera</i> ) and blue-winged warbler ( <i>V. cyanoptera</i> ) <sup>2</sup> | Species morphologically differentiated, but genetically indistinguishable using genetic markers. | Allozymes, AFLPs, introns, microsatellite markers, mitochondrial markers | ddRADseq, whole-genome resequencing | Species indistinguishable based on genetic and ddRADseq data. Whole-genome resequencing data differentiates species and identifies both historical natural gene flow and recent human-mediated gene flow. | Taxonomic recommendation to retain species designations, and to use both genetic and phenotypic data to inform conservation. |
| Spotted owl ( <i>Strix occidentalis</i> ) and barred owl ( <i>Strix varia</i> ) <sup>3</sup>                         | Species known to hybridise with subsequent backcrossing.                                         | Microsatellite markers, AFLPs                                            | Whole-genome resequencing           | Genetic data limited to identifying F1 and F2 hybrids. Genomic data provides no evidence of widespread introgression.                                                                                     | Hybridisation creates potential for replacement of the endangered spotted owl by the barred owl.                             |
| Przewalski's horse ( <i>Equus ferus przewalskii</i> ), and domesticated horse ( <i>E. caballus</i> ) <sup>4</sup>    | Species known to hybridise with subsequent backcrossing.                                         | Mitochondrial markers, sex chromosome markers                            | Whole genome resequencing           | Genomic data provides more nuanced evidence of both historical natural gene flow and recent human-mediated gene flow in captivity.                                                                        | Genomic data will be used to limit admixture in the Przewalski's horse conservation breeding program.                        |

|                                                                                                                                               |                                                                                                                                                       |                                                        |          |                                                                                                                                                                                                                                                                                 |                                                                                                                                                                                               |
|-----------------------------------------------------------------------------------------------------------------------------------------------|-------------------------------------------------------------------------------------------------------------------------------------------------------|--------------------------------------------------------|----------|---------------------------------------------------------------------------------------------------------------------------------------------------------------------------------------------------------------------------------------------------------------------------------|-----------------------------------------------------------------------------------------------------------------------------------------------------------------------------------------------|
| Eastern massasauga rattlesnake ( <i>Sistrurus catenatus</i> ) and Western massasauga rattlesnake ( <i>S. tergeminus</i> ) <sup>5</sup>        | Western edge of Eastern massasauga range displays evidence of historic admixture with nearby non-threatened Western massasauga.                       | Nuclear markers, mitochondrial markers                 | RADseq   | Limited population structure identified using genetic data. Genomic data provides evidence of additional population structure, including admixture attributed to historical natural gene flow.                                                                                  | Recommendation to categorise the admixed population as a 'Distinct Population Segment' under the Endangered Species Act (USA) due to its 'discreteness, significance, and population status'. |
| European pool frog ( <i>Pelophylax lessonae</i> ), edible frog ( <i>P. esculentus</i> ), Italian pool frog ( <i>P. bergeri</i> ) <sup>6</sup> | Species complex readily hybridises, including invasive <i>P. bergeri</i> with native <i>P. lessonae</i> and the hybridogenetic <i>P. esculentus</i> . | Mitochondrial markers, introns, microsatellite markers | RADseq   | Genetic data identified admixed lineages but could not distinguish between hybridisation or incomplete lineage sorting. Genomic data confirms species complex as a hybrid swarm across most of the range, excluding one population of <i>P. lessonae</i> .                      | Genetically distinct population of <i>P. lessonae</i> may warrant conservation prioritisation.                                                                                                |
| Devils Hole pupfish ( <i>Cyprinodon diabolis</i> ) and other <i>Cyprinodon</i> spp. <sup>7</sup>                                              | Many pupfish species readily hybridise and produce viable offspring.                                                                                  | Mitochondrial markers, microsatellite markers          | ddRADseq | Genomic data detects recent gene flow between <i>C. diabolis</i> and both <i>C. amargosae</i> and <i>C. pectoralis</i> .                                                                                                                                                        | Hybridisation creates potential for replacement of the Devils Hole pupfish, as has been common in the evolutionary history of the genus.                                                      |
| <i>Montipora</i> spp. (corals) <sup>8</sup>                                                                                                   | Taxonomic uncertainty, including potential introgressive hybridisation.                                                                               | Mitochondrial markers, nuclear markers                 | RADseq   | Genetic data clarified taxonomy, but could not distinguish introgression, incomplete lineage sorting, or phenotypic plasticity. Genomic data further resolves taxonomy and confirms introgression, but timing difficult to resolve due to recent origin of the species complex. | Revised taxonomy will inform conservation.                                                                                                                                                    |
| <i>Nautilus</i> spp. (molluscs) <sup>9</sup>                                                                                                  | Taxonomic uncertainty, including potential introgressive hybridisation.                                                                               | Mitochondrial markers, microsatellite markers          | ddRADseq | Genetic data insufficient for taxonomic delimitation. Genomic data resolves taxonomy, including evidence of recent admixture between species.                                                                                                                                   | Revised taxonomy will inform conservation.                                                                                                                                                    |

1. Peters et al., 2016; 2. Toews et al., 2016; 3. Hanna et al., 2018; 4. Der Sarkissian et al., 2015; 5. Sovic et al., 2016; 6. Dufresnes & Dubey, 2020; 7. Martin et al., 2016; 8. Cunha et al., 2019; 9. Combosch et al., 2017.

**Table 2** Sequencing outputs and mapping success of GBS data from kakī, Australian pied stilts/poaka, and interspecific hybrids averaged by species. Overall includes all samples along with negative and positive controls.

|                     | <b>Mean reads</b> | <b>Mean cleaned reads</b> | <b>Mean reads mapped to kakī genome</b> |
|---------------------|-------------------|---------------------------|-----------------------------------------|
| Kakī (n = 130)      | 2,094,197.47      | 1,378,947.26              | 1,211,024.32                            |
| Pied stilts (n = 6) | 1,722,470.33      | 966,686.33                | 879,153.17                              |
| Hybrids (n = 9)     | 1,181,117.00      | 812,732.00                | 732,418.11                              |
| Overall             | 1,971,321.13      | 1,293,796.12              | 1,138,306.05                            |

**Table 3** Summary statistics for single-nucleotide polymorphisms (SNPs) produced from GBS data for stilts. Mean  $\pm$  standard deviation (SD). KB = kilobase, HWE = Hardy-Weinberg Equilibrium, FDR = False Discovery Rate,  $F_{ST}$  = measure of population differentiation,  $Ts/Tv$  = ratio of transitions to transversions.

|                                                        | <b>Stilt SNP metrics</b> |
|--------------------------------------------------------|--------------------------|
| Total SNPs                                             | 15,851                   |
| Total samples                                          | 140                      |
| Total Kakī / Pied / Hybrid individuals                 | 125 / 6 / 9              |
| Mean depth per SNP per individual                      | 11.663 $\pm$ 6.107       |
| Mean per SNP depth                                     | 1,632.77 $\pm$ 668.176   |
| Mean SNP quality                                       | 1,248.19 $\pm$ 2447.43   |
| Mean frequency of missing data per individual          | 0.031 $\pm$ 0.073        |
| Mean SNPs/KB                                           | 0.014 $\pm$ 0.158        |
| Total singletons/private doubletons                    | 0                        |
| Mean nucleotide diversity; $\pi$                       | 0.0912 $\pm$ 0.100       |
| SNPs deviating from HWE (FDR-corrected $P \leq 0.05$ ) | 758                      |
| $Ts/Tv$ ratio                                          | 3.894                    |
| Weir & Cockerham mean $F_{ST}$ (Kakī v Pied)           | 0.622                    |
| Weir & Cockerham weighted mean $F_{ST}$ (Kakī v Pied)  | 0.637                    |



**Table 4** Population summary statistics from the three single-nucleotide polymorphism (SNP) sets produced from GBS data for kakī, Australian pied stilts/poaka, and interspecific hybrids, as calculated during format conversion from VCF to PLINK.

|                                     | <b>Kakī</b> | <b>Pied</b> | <b>Hybrid</b> |
|-------------------------------------|-------------|-------------|---------------|
| Mean samples per locus              | 121.990     | 5.542       | 8.141         |
| Polymorphic sites                   | 6,729       | 14,699      | 13,621        |
| Private alleles                     | 389         | 1,100       | 122           |
| Mean nucleotide diversity ( $\pi$ ) | 0.057       | 0.396       | 0.235         |

**Table 5** Mean individual assignment probabilities ( $Q$ -values) produced through 100 iterations of ADMIXTURE analysis for kakī that were assigned to the kakī cluster with probabilities above the 95% threshold, but below 100%.

| <b>DNA ID</b> | <b>Mean assignment probability, <math>Q</math></b> |
|---------------|----------------------------------------------------|
| DNA1252       | 0.9514                                             |
| DNA1429       | 0.9838                                             |
| DNA1620       | 0.9882                                             |
| DNA1694       | 0.9945                                             |
| DNA897        | 0.9882                                             |
| DNA932        | 0.9910                                             |

**Table 6** Comparison of the costs and benefits associated with a genetic approach (i.e., microsatellite panel) for assessing hybridisation in kakī with a genomics approach (i.e., genotyping-by-sequencing). With both platforms already established for kakī, future cost per sample is the primary deciding factor. All cost estimates are in British pounds (GBP) based on cost estimates in Aotearoa New Zealand.

|                                        | <b>Microsatellite panel</b>                                                                                                                                                                     | <b>Genotyping-by-sequencing</b>                                                                                                                                                                                            |
|----------------------------------------|-------------------------------------------------------------------------------------------------------------------------------------------------------------------------------------------------|----------------------------------------------------------------------------------------------------------------------------------------------------------------------------------------------------------------------------|
| Platform development cost              | < 5,000 GBP. Includes development and screening of ~20 polymorphic loci, and genotyping of up to 94 individuals (based on a known decrease in costs since the estimate of Galla et al. (2016)). | ~3,000 GBP. Includes testing of restriction enzymes and adapter barcoding, plus DNA extraction and sequencing of up to 94 samples, with expected output of 30–60K SNPs discovered via a de novo approach to SNP discovery. |
| Platform development time              | 3–4 months                                                                                                                                                                                      | 3–4 months                                                                                                                                                                                                                 |
| Cost per sample for additional samples | 10 GBP. Includes DNA extraction and quantification, and microsatellite genotyping at eight optimised loci. Excludes associated person-hours.                                                    | 30 GBP. Includes DNA extraction and quantification, and GBS. Excludes associated person-hours.                                                                                                                             |
| Lab time for additional samples        | 1 week                                                                                                                                                                                          | 1–3 months                                                                                                                                                                                                                 |
| Analysis time                          | 1 week                                                                                                                                                                                          | 4 weeks                                                                                                                                                                                                                    |

|                       |                                                                                                                                                                                                                                                                                                                                                                                                                                      |                                                                                                                                                                                                                                                                                                                                                                                                          |
|-----------------------|--------------------------------------------------------------------------------------------------------------------------------------------------------------------------------------------------------------------------------------------------------------------------------------------------------------------------------------------------------------------------------------------------------------------------------------|----------------------------------------------------------------------------------------------------------------------------------------------------------------------------------------------------------------------------------------------------------------------------------------------------------------------------------------------------------------------------------------------------------|
| Analysis requirements | <p>Access to a standard desktop computer.</p> <p>Access to allele-calling software (e.g., GeneMarker v2.2).</p> <p>Access to and experience with genetic population clustering tools optional.</p>                                                                                                                                                                                                                                   | <p>Access to a high-capacity computing system or capable computing cluster.</p> <p>Access to and experience with a variety of population genomic and bioinformatic tools.</p>                                                                                                                                                                                                                            |
| Additional benefits   | <p>Previous uncertainty regarding how representative of genome-wide patterns of introgression these data are is now resolved for kakī by comparison with GBS data, indicating the eight loci are sufficient for robust identification of non-kakī individuals.</p> <p>All wet-lab work and analysis for additional samples can be run in-house.</p>                                                                                  | <p>Increased confidence in detection of introgression with large genome-wide SNP set compared with microsatellites.</p> <p>No ascertainment bias associated with marker generation.</p> <p>Once these data are generated, they can be implemented for a variety of downstream uses.</p> <p>Potential for these data to have additional application in the future with genomic analysis developments.</p> |
| Limitations           | <p>Caveats associated with how the microsatellite loci are generated, and what they were developed for (e.g., active avoidance of regions under selection, ascertainment bias from selecting the most heterozygous markers). This limits the type of data produced, and thus the types of analyses that can be performed.</p> <p>Potential for human error associated with manual allele-calling, but mitigated with experience.</p> | <p>Additional sampling requires the SNP discovery pipeline to be run with all previous samples included every time, and so analysis does not become more efficient over time.</p> <p>Potential for batch effects between different sequencing batches (Leigh et al., 2018).</p> <p>Analyses limited by software and models available in a developing field.</p>                                          |



**Kakī**

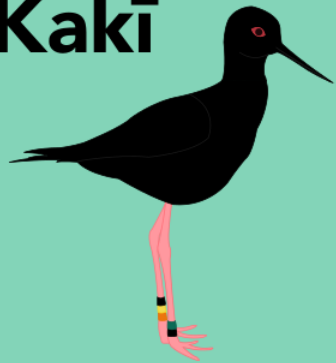

**X**

**Poaka**

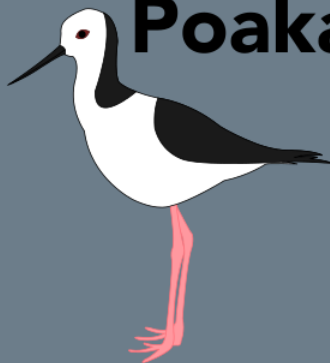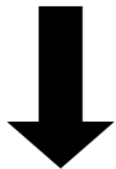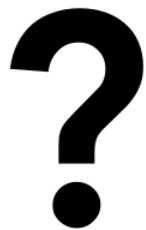

Are there  
cryptic hybrids  
among kakī?

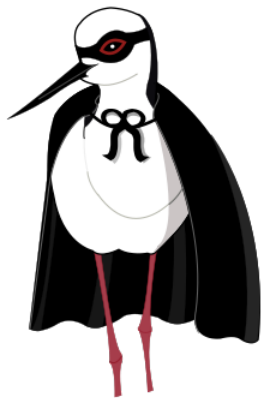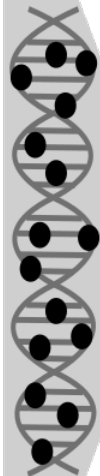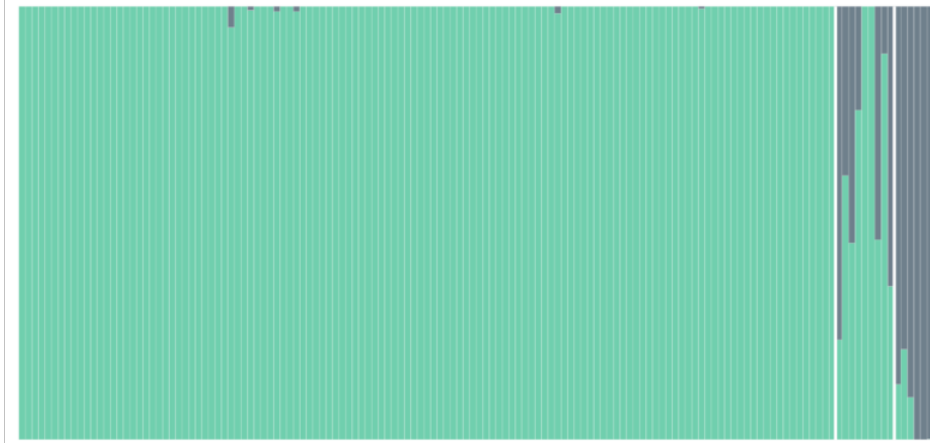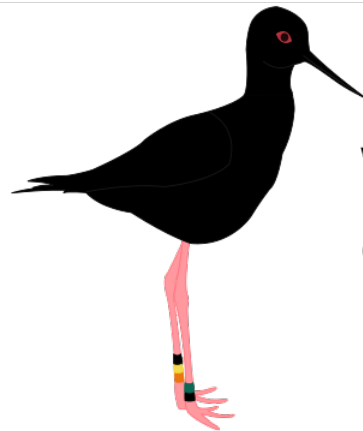

We found no  
evidence of cryptic  
hybrids among kakī.
